# Supplementary material for: How does CEO narcissism affect enterprise ambidextrous technological innovation? The mediating role of corporate social responsibility
Source: PLoS One. 2023 Jan 20;18(1):e0280758. doi: 10.1371/journal.pone.0280758 (PMC9858043; doi:10.1371/journal.pone.0280758)
Supplement: S1 Data — (XLSX) [file pone.0280758.s001.xlsx]

## Sheet: Sheet1
id	year	pat1	pat2	nar	csr	age	post	edu	rd	size	debt	set	pattern	industry
1	2015	1.79176	3.46574	0.439084	64	58	0	4	1.09	23.3861	0.636919	28	1	39
1	2016	1.94591	3.21888	0.439084	60	59	0	4	1.11	23.1843	0.547908	28	1	39
1	2017	1.38629	2.99573	0.439084	27	59	0	4	1.12	23.5326	0.642835	28	1	39
1	2018	1.09861	3.17805	0.439084	27	60	0	4	1.24	23.4957	0.576803	28	1	39
1	2019	2.07944	3.43399	0.439084	25	61	0	4	1.57	23.6385	0.615132	28	1	39
1	2020	1.79176	3.52636	0.439084	27	62	0	4	1.7	23.7976	0.629761	28	1	39
2	2015	4.33073	3.95124	0.538355	70	58	1	3	3.6	25.4396	0.663286	18	0	39
2	2016	4.86753	3.43399	0.538355	86	59	1	3	4.01	25.7146	0.689087	18	0	39
2	2017	5.18178	3.04452	0.538355	30	60	1	3	4.25	25.8003	0.662227	18	0	39
2	2018	5.11199	1.60944	0.538355	28	61	1	3	5	25.9684	0.684217	18	0	39
2	2019	5.71373	2.99573	0.538355	23	62	1	3	7.29	25.8283	0.612465	18	0	39
2	2020	5.85793	2.89037	0.538355	24	63	1	3	8.53	25.9684	0.650817	18	0	39
3	2015	6.18002	5.46383	0.161335	57	60	1	5	5.07	25.2636	0.566712	22	1	35
3	2016	6.1203	3.95124	0.161335	66	61	1	5	4.49	25.2135	0.576009	22	1	35
3	2017	5.34711	3.7612	0.161335	18	62	1	5	3.75	25.1439	0.540256	22	1	35
3	2018	4.56435	2.77259	0.161335	25	63	1	5	3.76	25.2608	0.585172	22	1	35
3	2019	4.21951	3.63759	0.161335	18	64	1	5	4.83	25.2458	0.570609	22	1	35
3	2020	4.77912	4.70953	0.161335	29	65	1	5	5.38	25.4792	0.588158	22	1	35
4	2015	4.54329	8.33807	0.385185	74	49	1	4	3.8	25.5819	0.565113	9	0	38
4	2016	6.01127	8.19809	0.385185	75	50	1	4	3.8	25.8626	0.595683	9	0	38
4	2017	6.18002	8.21175	0.385185	31	51	1	4	3.53	25.9684	0.665768	9	0	38
4	2018	6.18002	8.37171	0.385185	32	52	1	4	3.78	25.9684	0.649397	9	0	38
4	2019	6.18002	8.2958	0.385185	33	53	1	4	3.46	25.9684	0.644	9	0	38
4	2020	6.18002	8.17188	0.385185	32	54	1	4	3.56	25.9684	0.655263	9	0	38
5	2015	4.63473	5.66988	0.361507	76	54	1	5	4.41	25.4671	0.636761	15	1	36
5	2016	5.09375	5.78074	0.361507	70	55	1	5	3.81	25.8231	0.728267	15	1	36
5	2017	4.63473	5.11199	0.361507	27	56	1	5	3.73	25.9684	0.702829	15	1	36
5	2018	5.11799	5.90536	0.361507	29	57	1	5	4.08	25.9684	0.696705	15	1	36
5	2019	5.37528	5.96101	0.361507	28	58	1	5	4.21	25.9684	0.705383	15	1	36
5	2020	6.10032	6.73459	0.361507	26	59	1	5	4.2	25.9684	0.702924	15	1	36
6	2015	1.79176	2.63906	0.420014	63	49	0	3	3.88	23.2685	0.640637	28	0	36
6	2016	2.3979	3.09104	0.420014	60	50	0	3	4.07	23.1672	0.589862	28	0	36
6	2017	2.19722	2.89037	0.420014	26	51	0	3	4.37	23.1682	0.532298	28	0	36
6	2018	0.693147	4.02535	0.420014	24	52	0	3	4.52	23.2122	0.546613	28	0	36
6	2019	0.693147	4.02535	0.420014	21	53	0	3	4.62	23.2105	0.54705	28	0	36
6	2020	2.48491	4.68213	0.420014	23	54	0	3	4.33	23.4635	0.428987	28	0	36
7	2015	6.08677	7.55904	0.538355	75	61	1	4	3.44	25.809	0.699646	26	0	38
7	2016	6.18002	7.92624	0.538355	79	62	1	4	3.85	25.9293	0.698834	26	0	38
7	2017	6.18002	7.86978	0.538355	24	63	1	4	3.89	25.9684	0.689094	26	0	38
7	2018	6.18002	8.19864	0.538355	33	64	1	4	3.67	25.9684	0.630963	26	0	38
7	2019	6.18002	8.6606	0.538355	31	65	1	4	3.03	25.9684	0.604033	26	0	38
7	2020	6.18002	8.75951	0.538355	33	66	1	4	3.69	25.9684	0.581401	26	0	38
8	2015	0	1.09861	0.306272	23	47	1	6	2.71	22.2401	0.470709	25	0	36
8	2016	0.693147	0	0.306272	24	48	1	6	3.48	22.504	0.477059	25	0	36
8	2017	0	0	0.306272	24	49	1	6	3.85	22.7425	0.64302	25	0	36
8	2018	0	1.79176	0.306272	25	50	1	6	3.93	22.7244	0.685327	25	0	36
8	2019	0	0	0.306272	25	51	1	6	3.81	22.7832	0.696701	25	0	36
8	2020	0	0	0.306272	25	52	1	6	3.44	22.8471	0.669227	25	0	36
9	2015	0.693147	0	0.189544	15	34	1	4	3.85	21.7451	0.360654	24	0	35
9	2016	1.09861	2.94444	0.189544	16	35	1	4	4.43	21.8062	0.366865	24	0	35
9	2017	0	2.89037	0.189544	16	37	1	4	4.88	21.8326	0.363028	24	0	35
9	2018	1.60944	3.13549	0.189544	14	38	1	4	4.68	22.375	0.433792	24	0	35
9	2019	1.09861	3.21888	0.189544	-2.1	39	1	4	6.72	22.3348	0.523492	24	0	35
9	2020	0.693147	3.3673	0.189544	8.8	40	1	4	5.01	22.5566	0.610195	24	0	35
10	2015	1.09861	1.94591	0.242295	15	47	0	4	3.17	22.2525	0.312977	25	1	39
10	2016	0	1.09861	0.242295	18	48	0	4	3.37	22.2748	0.292314	25	1	39
10	2017	1.09861	2.07944	0.242295	18	49	0	4	3.52	22.3514	0.312729	25	1	39
10	2018	0	2.3979	0.242295	19	50	0	4	3.91	22.4155	0.315478	25	1	39
10	2019	0	1.60944	0.242295	19	51	0	4	4.43	22.4654	0.306273	25	1	39
10	2020	0	1.38629	0.242295	20	52	0	4	4.33	22.6572	0.376553	25	1	39
11	2015	2.83321	5.3033	0.383054	5.1	54	0	4	2.9	22.5439	0.767251	25	1	36
11	2016	3.61092	6.05209	0.383054	12	55	0	3	3.25	22.9292	0.784822	25	1	36
11	2017	4.26268	5.92426	0.383054	4.5	56	0	3	2.59	22.8001	0.784822	25	1	36
11	2018	4.51086	5.40268	0.383054	-6.3	57	0	3	3.97	22.6878	0.784822	25	1	36
11	2019	3.04452	5.03695	0.383054	11	58	0	3	3.02	22.3831	0.784822	25	1	36
11	2020	2.83321	4.8752	0.383054	10	59	0	4	3.69	22.3548	0.784822	25	1	36
12	2015	2.56495	0	0.305453	26	49	0	2	5.28	22.9979	0.274672	18	0	27
12	2016	3.13549	0	0.305453	87	50	0	6	5.4	23.1578	0.290971	18	0	27
12	2017	2.30259	0	0.305453	33	51	0	6	5.39	23.6237	0.230256	18	0	27
12	2018	2.30259	1.09861	0.305453	33	52	0	6	1.01	23.8113	0.260766	18	0	27
12	2019	2.99573	1.60944	0.305453	31	53	0	6	5.7	24.0732	0.407028	18	0	27
12	2020	3.8712	1.38629	0.305453	31	54	0	6	5.29	24.1539	0.371983	18	0	27
13	2015	0.693147	0	0.186621	67	67	1	3	4.72	22.1149	0.0496506	18	0	27
13	2016	1.09861	0	0.186621	75	67	1	3	5.1	22.2602	0.0496506	18	0	27
13	2017	0	0	0.186621	28	67	1	3	5.52	22.3756	0.0722776	18	0	27
13	2018	0	2.3979	0.186621	28	67	1	3	4.81	22.594	0.11096	18	0	27
13	2019	1.09861	1.09861	0.186621	29	67	1	3	4	22.7492	0.0922112	18	0	27
13	2020	1.09861	2.07944	0.186621	28	67	1	3	4.35	23.0297	0.193076	18	0	27
14	2015	4.18965	5.16479	0.425841	28	49	1	4	8.79	22.7491	0.352195	18	0	35
14	2016	4.52179	5.23644	0.425841	27	50	1	4	8.41	23.0621	0.464944	18	0	35
14	2017	4.66344	5.56452	0.425841	24	51	1	4	7.36	23.3697	0.483533	18	0	35
14	2018	4.54329	6.34914	0.425841	26	52	1	4	9	23.6648	0.546257	18	0	35
14	2019	4.70953	6.46614	0.425841	21	53	1	4	10.9	23.6077	0.492654	18	0	35
14	2020	5.19296	6.71538	0.425841	23	54	1	4	10.8	23.7841	0.526873	18	0	35
15	2015	1.09861	1.94591	0.19646	25	50	0	3	8.79	21.8966	0.278335	18	1	39
15	2016	2.3979	0.693147	0.19646	26	51	0	3	9.47	22.0357	0.303638	18	1	39
15	2017	1.94591	1.94591	0.19646	24	52	0	3	9.08	22.2031	0.355667	18	1	39
15	2018	2.30259	1.38629	0.19646	21	53	0	3	10.6	22.2754	0.325239	18	1	39
15	2019	2.19722	2.48491	0.19646	20	54	0	3	10.7	22.445	0.342624	18	1	39
15	2020	2.48491	2.48491	0.19646	20	55	0	3	10.1	22.5878	0.36163	18	1	39
16	2015	1.60944	0.693147	0.303909	26	46	1	3	6.89	22.5466	0.335835	18	0	38
16	2016	1.38629	2.3979	0.303909	23	47	1	3	7.69	22.5889	0.326221	18	0	38
16	2017	2.07944	1.79176	0.303909	18	48	1	3	8.01	22.6387	0.335728	18	0	38
16	2018	1.60944	2.48491	0.303909	19	49	1	3	7.35	22.7487	0.378972	18	0	38
16	2019	1.60944	1.60944	0.303909	21	50	1	3	6.07	22.9031	0.412307	18	0	38
16	2020	0	2.30259	0.303909	25	51	1	3	5.77	23.128	0.394063	18	0	38
17	2015	0	2.83321	0.110905	20	43	0	3	3.66	22.1978	0.291431	18	0	35
17	2016	1.09861	2.07944	0.110905	17	44	0	3	4.83	22.2826	0.354222	18	0	35
17	2017	1.09861	2.56495	0.110905	14	45	0	3	4.43	22.6713	0.516495	18	0	35
17	2018	1.60944	3.13549	0.110905	15	46	0	3	5.5	22.684	0.50659	18	0	35
17	2019	2.07944	2.77259	0.110905	15	47	0	3	5.68	22.4721	0.371676	18	0	35
17	2020	1.09861	2.99573	0.110905	-0.04	48	0	3	4.04	22.5157	0.433992	18	0	35
18	2015	2.19722	4.26268	0.262173	29	55	0	2	3.26	21.7442	0.434118	18	0	38
18	2016	2.19722	4.45435	0.262173	67	56	0	2	3.12	22.0023	0.500541	18	0	38
18	2017	2.3979	4.63473	0.262173	30	57	0	2	3.21	22.1608	0.462793	18	0	38
18	2018	2.89037	5.45959	0.262173	31	58	0	2	3.67	22.3898	0.494736	18	0	38
18	2019	1.94591	6.05678	0.262173	29	59	0	2	4.13	22.511	0.47848	18	0	38
18	2020	2.63906	6.74288	0.262173	25	60	0	2	5.05	22.4886	0.446583	18	0	38
19	2015	0	3.3322	0.27315	19	45	0	3	5.77	21.7802	0.537999	17	0	39
19	2016	1.94591	2.89037	0.27315	16	46	0	3	5.93	21.8233	0.529116	17	0	39
19	2017	1.38629	2.3979	0.27315	18	47	0	3	4.51	22.1499	0.64045	17	0	39
19	2018	1.60944	2.48491	0.27315	11	48	0	3	5.12	22.2931	0.643403	17	0	39
19	2019	1.60944	3.61092	0.27315	22	49	0	3	4.27	22.1673	0.544514	17	0	39
19	2020	2.07944	2.56495	0.27315	14	50	0	3	4.84	22.2238	0.545034	17	0	39
20	2015	0.693147	0	0.239032	26	45	0	6	25	21.4342	0.156541	16	1	65
20	2016	0	1.09861	0.239032	51	46	0	6	22.2	21.5681	0.196583	16	1	65
20	2017	2.99573	0	0.239032	23	47	0	6	24.8	21.6375	0.160246	16	1	65
20	2018	2.07944	1.79176	0.239032	22	48	0	6	23.3	21.7142	0.130524	16	1	65
20	2019	2.3979	1.60944	0.239032	21	49	0	6	22.5	21.7901	0.111441	16	1	65
20	2020	2.19722	2.89037	0.239032	25	50	0	6	24.3	21.8669	0.118111	16	1	65
21	2015	0	0.693147	0.0963202	27	53	0	4	15.7	23.1353	0.228172	16	0	65
21	2016	0	1.09861	0.0963202	60	54	0	4	12.5	23.2432	0.283393	16	0	65
21	2017	0	0	0.0963202	24	55	0	4	15.3	23.3733	0.362665	16	0	65
21	2018	0.693147	0	0.0963202	18	56	0	4	12	23.4962	0.420781	16	0	65
21	2019	1.09861	0	0.0963202	19	57	0	4	13.8	23.5467	0.429821	16	0	65
21	2020	0	1.09861	0.0963202	15	58	0	4	12.7	23.6615	0.469193	16	0	65
22	2015	0	0	0.340395	18	45	0	6	4.12	21.7391	0.472599	16	1	36
22	2016	1.38629	0	0.340395	19	46	0	6	4.27	22.0549	0.427817	16	1	36
22	2017	1.38629	1.38629	0.340395	21	47	0	6	3.63	22.7895	0.41861	16	1	36
22	2018	1.09861	2.94444	0.340395	24	48	0	6	4.52	22.862	0.423723	16	1	36
22	2019	0.693147	2.56495	0.340395	15	49	0	6	4.21	22.8126	0.40851	16	1	36
22	2020	1.38629	3.3322	0.340395	17	50	0	6	4.68	22.8136	0.393811	16	1	36
23	2015	1.38629	3.58352	0.406031	2.5	52	0	3	6.15	22.1775	0.183904	15	1	39
23	2016	2.48491	2.63906	0.406031	23	53	0	3	3.09	22.2595	0.199965	15	1	39
23	2017	2.30259	1.09861	0.406031	23	54	0	3	3.38	22.2648	0.18813	15	1	39
23	2018	2.30259	2.19722	0.406031	22	55	0	3	3.99	22.3012	0.206671	15	1	39
23	2019	1.60944	2.19722	0.406031	22	56	0	3	4.15	22.3959	0.238237	15	1	39
23	2020	1.60944	3.2581	0.406031	24	57	0	3	4.06	22.5475	0.286713	15	1	39
24	2015	1.60944	1.60944	0.260537	10	51	0	3	3.43	21.0836	0.662148	15	1	38
24	2016	1.38629	0	0.260537	7.2	52	0	3	4.49	20.9302	0.589076	15	1	38
24	2017	1.09861	0	0.260537	-0.52	53	0	3	6.63	20.8791	0.676349	15	1	38
24	2018	0	0	0.260537	8.3	54	0	3	3.06	20.7258	0.61649	15	1	38
24	2019	0.693147	1.79176	0.260537	14	55	0	3	3.47	20.7626	0.634387	15	1	38
24	2020	0	2.56495	0.260537	11	56	0	3	3.37	20.8314	0.643324	15	1	38
25	2015	3.13549	3.97029	0.355266	23	45	0	4	4.54	22.0242	0.535474	15	0	39
25	2016	3.43399	4.35671	0.355266	13	46	0	4	5.24	22.4023	0.505921	15	0	39
25	2017	3.2581	4.7185	0.355266	13	47	0	4	4.13	22.5527	0.552854	15	0	39
25	2018	3.2581	4.99043	0.355266	3.4	48	0	4	5.27	22.5838	0.563901	15	0	39
25	2019	2.48491	4.35671	0.355266	16	49	0	4	5.52	22.586	0.517188	15	0	39
25	2020	1.94591	4.94876	0.355266	20	50	0	4	6.31	22.6534	0.485162	15	0	39
26	2015	2.70805	1.09861	0.306101	25	51	0	4	5.4	21.8987	0.256511	15	0	39
26	2016	3.13549	2.77259	0.306101	18	52	0	4	4.5	22.1198	0.340463	15	0	39
26	2017	3.43399	2.83321	0.306101	24	53	0	4	5.44	22.2853	0.150497	15	0	39
26	2018	3.17805	3.04452	0.306101	25	54	0	4	5.65	22.3791	0.167967	15	0	39
26	2019	2.99573	3.49651	0.306101	22	55	0	4	7.3	22.5645	0.284763	15	0	39
26	2020	2.19722	3.29584	0.306101	23	56	0	4	7.02	22.7411	0.342088	15	0	39
27	2015	1.79176	2.99573	0.216215	21	51	1	4	6.31	21.2111	0.403068	15	0	38
27	2016	2.07944	2.89037	0.216215	24	52	1	4	7.47	21.7222	0.32204	15	0	38
27	2017	2.07944	3.82864	0.216215	22	53	1	4	7.72	21.8892	0.353559	15	0	38
27	2018	1.60944	3.73767	0.216215	23	54	1	4	7.37	22.0967	0.426097	15	0	38
27	2019	2.56495	4.59512	0.216215	22	55	1	4	8.16	22.3567	0.485485	15	0	38
27	2020	2.30259	4.89784	0.216215	22	56	1	4	7.28	22.6415	0.478806	15	0	38
28	2015	3.17805	4.23411	0.37058	17	44	0	3	11.5	22.5969	0.425611	15	0	39
28	2016	3.7612	3.3673	0.37058	11	45	0	3	6.89	23.1395	0.451782	15	0	39
28	2017	4.07754	1.38629	0.37058	2.5	46	0	3	5.98	23.2203	0.484765	15	0	39
28	2018	3.80666	1.09861	0.37058	-5	47	0	3	7.78	23.3601	0.534477	15	0	39
28	2019	2.48491	1.79176	0.37058	23	48	0	3	8.53	23.5056	0.597569	15	0	39
28	2020	2.94444	2.07944	0.37058	6.7	49	0	3	7.56	23.7787	0.528281	15	0	39
29	2015	1.60944	2.89037	0.370798	21	56	0	3	6.17	21.8609	0.375347	15	0	39
29	2016	2.30259	3.63759	0.370798	16	57	0	3	6.11	24.6875	0.784822	15	0	39
29	2017	2.07944	3.58352	0.370798	21	58	0	3	7.69	24.2936	0.784822	15	0	39
29	2018	2.07944	3.3673	0.370798	13	59	0	3	6.74	24.3099	0.762841	15	0	39
29	2019	2.99573	3.46574	0.370798	23	60	0	3	6.25	24.3561	0.746428	15	0	39
29	2020	2.30259	3.7612	0.370798	17	61	0	3	6.37	24.3668	0.681549	15	0	39
30	2015	0	0	0.401485	24	51	0	4	4.67	21.3855	0.517863	15	0	38
30	2016	0.693147	0.693147	0.401485	23	52	0	4	5.58	21.4917	0.41985	15	0	38
30	2017	0.693147	0	0.401485	28	53	0	4	4.49	21.4923	0.410656	15	0	38
30	2018	0.693147	1.38629	0.401485	-4.5	54	0	4	5.64	21.476	0.492891	15	0	38
30	2019	0	1.94591	0.401485	31	55	0	4	3.5	21.4273	0.444151	15	0	38
30	2020	0	1.79176	0.401485	31	56	0	4	3.4	21.5765	0.46224	15	0	38
31	2015	2.19722	2.63906	0.174924	18	44	0	4	6.38	22.6789	0.252166	15	0	39
31	2016	2.19722	2.07944	0.174924	18	45	0	4	5.3	22.7615	0.282894	15	0	39
31	2017	1.94591	1.09861	0.174924	17	45	0	4	5.04	22.9604	0.359891	15	0	39
31	2018	1.09861	2.30259	0.174924	15	46	0	4	5.39	23.2444	0.487656	15	0	39
31	2019	1.09861	2.30259	0.174924	15	47	0	4	4.96	23.4987	0.3818	15	0	39
31	2020	0.693147	1.38629	0.174924	17	48	0	4	5.51	23.6838	0.397914	15	0	39
32	2015	1.94591	0.693147	0.111045	17	53	1	4	4.43	21.8025	0.577133	15	0	34
32	2016	1.38629	0.693147	0.111045	16	54	1	4	4.99	22.2812	0.416065	15	0	34
32	2017	1.79176	2.70805	0.111045	16	55	1	4	5.96	22.395	0.472114	15	0	34
32	2018	1.09861	2.56495	0.111045	3.8	56	1	4	6.29	22.3768	0.535923	15	0	34
32	2019	1.38629	3.49651	0.111045	3.7	57	1	4	8.2	22.5132	0.598295	15	0	34
32	2020	2.19722	2.63906	0.111045	14	58	1	4	8.34	22.5937	0.626754	15	0	34
33	2015	3.49651	4.34381	0.140847	8.8	35	1	3	4.49	21.1991	0.588995	14	0	35
33	2016	3.78419	4.44265	0.140847	4.6	35	0	3	4.79	21.2167	0.626063	14	0	35
33	2017	3.85015	3.8712	0.140847	8.2	36	0	3	5.1	21.2285	0.617293	14	0	35
33	2018	3.78419	3.95124	0.140847	9.2	37	0	3	2.7	21.1001	0.558556	14	0	35
33	2019	2.3979	3.7612	0.140847	6.7	38	0	3	3.68	21.088	0.579473	14	0	35
33	2020	0.693147	3.93183	0.140847	11	39	0	3	3.26	21.1358	0.58331	14	0	35
34	2015	2.19722	0	0.173443	15	50	1	3	18.3	21.073	0.325937	14	0	39
34	2016	1.09861	0	0.173443	14	51	1	3	24	20.9461	0.217654	14	0	39
34	2017	1.09861	0	0.173443	15	52	1	3	17	21.0792	0.302099	14	0	39
34	2018	0	2.19722	0.173443	17	53	1	3	14.9	21.0973	0.283899	14	0	39
34	2019	1.38629	1.79176	0.173443	22	54	1	3	16.6	21.1729	0.26468	14	0	39
34	2020	1.09861	1.79176	0.173443	23	55	1	3	11.3	21.3403	0.217873	14	0	39
35	2015	2.94444	2.94444	0.445375	60	42	1	5	23.1	22.8503	0.222538	14	0	65
35	2016	3.61092	1.79176	0.445375	60	43	1	5	21.4	23.0664	0.306817	14	0	65
35	2017	3.21888	2.19722	0.445375	27	44	1	5	21	23.3141	0.403875	14	0	65
35	2018	3.3673	4.21951	0.445375	19	45	1	5	22.4	23.4513	0.463375	14	0	65
35	2019	4.33073	4.89784	0.445375	24	46	1	5	21.3	23.724	0.416202	14	0	65
35	2020	4.49981	4.98361	0.445375	22	47	1	5	18.5	23.9356	0.477703	14	0	65
36	2015	4.56435	6.36303	0.14522	73	42	0	5	7.12	23.6807	0.506598	14	0	39
36	2016	4.64439	6.69827	0.14522	25	43	0	5	6.94	23.8549	0.526519	14	0	39
36	2017	5.11799	5.91889	0.14522	25	44	0	5	6.64	24.0031	0.438572	14	0	39
36	2018	5.50126	5.42054	0.14522	21	45	0	5	7.97	24.1158	0.489291	14	0	39
36	2019	5.89715	4.60517	0.14522	22	46	0	5	5.76	24.2689	0.534649	14	0	39
36	2020	5.99396	4.5326	0.14522	24	47	0	5	6.12	24.6175	0.598238	14	0	39
37	2015	1.79176	4.20469	0.344391	76	53	0	3	4.88	22.7522	0.49405	14	0	38
37	2016	2.63906	4.21951	0.344391	73	54	0	3	4.24	23.3983	0.387147	14	0	38
37	2017	2.48491	4.20469	0.344391	21	55	0	3	4.57	23.5605	0.433955	14	0	38
37	2018	3.04452	5.00395	0.344391	-1.1	56	0	3	4.74	23.4017	0.541033	14	0	38
37	2019	2.70805	5.07517	0.344391	14	57	0	3	5.04	23.3463	0.472666	14	0	38
37	2020	2.19722	4.93447	0.344391	14	58	0	3	5.51	23.3525	0.377534	14	0	38
38	2015	0.693147	1.38629	0.218647	17	62	1	2	3.21	22.0214	0.358462	14	0	34
38	2016	1.09861	2.56495	0.218647	17	63	1	2	4.66	22.029	0.339084	14	0	34
38	2017	1.09861	0.693147	0.218647	17	64	1	2	6.14	22.6238	0.486502	14	0	34
38	2018	1.94591	3.04452	0.218647	3.1	65	1	2	3.7	22.7488	0.473721	14	0	34
38	2019	0.693147	2.89037	0.218647	1.1	66	1	2	4.11	22.3143	0.632833	14	0	34
38	2020	1.94591	2.07944	0.218647	19	67	1	2	5.84	22.3391	0.428315	14	0	34
39	2015	1.79176	1.94591	0.470314	23	40	0	6	2.63	21.6597	0.283663	14	0	27
39	2016	2.19722	0	0.470314	23	41	0	6	2.75	21.8135	0.286052	14	0	27
39	2017	1.60944	1.38629	0.470314	23	42	0	6	3.42	21.9177	0.254498	14	0	27
39	2018	1.38629	0.693147	0.470314	25	43	0	6	4.46	22.1171	0.266657	14	0	27
39	2019	1.38629	2.19722	0.470314	27	44	0	6	4.55	22.1587	0.142016	14	0	27
39	2020	2.19722	2.56495	0.470314	28	45	0	6	7.31	22.2811	0.135401	14	0	27
40	2015	1.09861	0.693147	0.172021	30	57	0	3	4.14	21.7384	0.150954	13	0	27
40	2016	1.60944	2.48491	0.172021	31	58	0	3	4.3	21.7775	0.154802	13	0	27
40	2017	0.693147	2.3979	0.172021	32	59	0	3	3.93	21.8956	0.178245	13	0	27
40	2018	0	1.09861	0.172021	32	60	0	3	4.08	21.9488	0.175997	13	0	27
40	2019	1.09861	2.07944	0.172021	30	61	0	3	6.35	21.9516	0.175717	13	0	27
40	2020	1.60944	1.79176	0.172021	32	62	0	3	9.85	22.0797	0.237817	13	0	27
41	2015	3.21888	2.70805	0.37177	30	52	0	4	9.81	22.162	0.370404	13	1	39
41	2016	3.3673	1.79176	0.37177	57	53	0	4	8.5	22.2954	0.395116	13	1	39
41	2017	3.68888	2.07944	0.37177	25	54	0	4	8.94	22.3647	0.386007	13	1	39
41	2018	3.66356	3.29584	0.37177	19	55	0	4	9.3	22.5285	0.433165	13	1	39
41	2019	4.62497	3.61092	0.37177	22	56	0	4	10.1	22.7019	0.373282	13	1	39
41	2020	4.12713	3.21888	0.37177	24	57	0	4	10.8	22.8697	0.414209	13	1	39
42	2015	1.60944	3.04452	0.0582011	17	46	0	4	4.78	22.289	0.285025	13	0	36
42	2016	1.38629	2.83321	0.0582011	17	47	0	4	4.9	22.3571	0.292427	13	0	36
42	2017	1.38629	2.48491	0.0582011	19	48	0	4	4.16	22.5564	0.364172	13	0	36
42	2018	1.60944	1.79176	0.0582011	20	49	0	4	4.12	22.5786	0.33922	13	0	36
42	2019	1.09861	3.17805	0.0582011	19	50	0	4	6.13	22.6428	0.329598	13	0	36
42	2020	0	2.56495	0.0582011	22	51	0	4	5.16	22.8192	0.379459	13	0	36
43	2015	0.693147	0	0.468148	31	52	0	6	4.09	21.4509	0.202427	13	0	27
43	2016	0.693147	0	0.468148	68	53	0	6	4.42	21.4536	0.156253	13	0	27
43	2017	0	0	0.468148	29	54	0	6	3.98	21.5547	0.175382	13	0	27
43	2018	0	0	0.468148	30	55	0	6	3.98	21.5617	0.115679	13	0	27
43	2019	0	1.09861	0.468148	30	55	0	6	4.53	21.8166	0.242014	13	0	27
43	2020	0	1.09861	0.468148	29	56	0	6	6.49	22.2182	0.409166	13	0	27
44	2015	1.09861	0	0.271987	34	42	0	4	9.05	22.4072	0.128321	13	0	27
44	2016	2.83321	0	0.271987	34	43	0	4	7.83	22.6003	0.164378	13	0	27
44	2017	1.79176	0	0.271987	35	44	0	4	10.6	22.6496	0.10283	13	0	27
44	2018	1.60944	0	0.271987	35	45	0	4	17.3	22.7907	0.130756	13	0	27
44	2019	1.60944	0	0.271987	35	46	0	4	17.4	22.7688	0.137965	13	0	27
44	2020	1.94591	0.693147	0.271987	17	47	0	4	28.2	22.6575	0.191781	13	0	27
45	2015	1.60944	1.38629	0.228938	59	47	0	3	11.2	21.4855	0.322661	13	0	39
45	2016	1.94591	1.79176	0.228938	25	48	0	3	10.2	21.5275	0.30994	13	0	39
45	2017	1.09861	1.79176	0.228938	-5.2	49	0	3	10.9	21.5337	0.371909	13	0	39
45	2018	1.94591	1.94591	0.228938	26	50	0	3	12.2	21.4406	0.287727	13	0	39
45	2019	0	3.04452	0.228938	24	51	0	3	15.4	21.3477	0.166928	13	0	39
45	2020	2.30259	2.19722	0.228938	27	52	0	3	10.6	21.4972	0.242769	13	0	39
46	2015	1.60944	0	0.148375	30	46	0	6	6.81	21.9274	0.367266	13	0	27
46	2016	2.07944	0.693147	0.148375	29	47	1	3	8.72	22.1644	0.189622	13	0	27
46	2017	1.60944	0	0.148375	28	48	1	3	6.37	22.3035	0.231822	13	0	27
46	2018	0	0	0.148375	29	49	1	3	6.28	22.3804	0.246639	13	0	27
46	2019	1.94591	0	0.148375	27	50	1	3	5.93	22.4292	0.249173	13	0	27
46	2020	1.60944	1.09861	0.148375	-1.1	51	1	3	9.49	22.2869	0.240698	13	0	27
47	2015	1.79176	0	0.408724	23	46	0	3	3.49	21.9584	0.374073	12	1	27
47	2016	1.09861	0	0.408724	24	47	1	4	3.48	22.0099	0.382167	12	1	27
47	2017	1.60944	0	0.408724	25	48	1	4	3.09	22.3593	0.535317	12	1	27
47	2018	0.693147	0	0.408724	25	49	1	4	3.94	22.4176	0.50208	12	1	27
47	2019	1.94591	1.09861	0.408724	25	50	1	4	5.51	22.4853	0.474859	12	1	27
47	2020	1.79176	1.60944	0.408724	27	51	1	4	5.19	22.6458	0.329893	12	1	27
48	2015	3.63759	4.35671	0.144704	24	50	1	3	11.4	21.4339	0.171339	12	0	38
48	2016	3.61092	3.78419	0.144704	18	51	1	3	13.4	21.6723	0.338957	12	0	38
48	2017	3.58352	2.63906	0.144704	24	52	1	3	11.2	21.8924	0.392225	12	0	38
48	2018	3.55535	3.63759	0.144704	22	53	1	3	11.6	21.9502	0.410249	12	0	38
48	2019	2.89037	3.61092	0.144704	2	54	1	3	13.1	21.7067	0.417781	12	0	38
48	2020	3.04452	3.68888	0.144704	18	55	1	3	11.1	21.7698	0.41207	12	0	38
49	2015	1.94591	2.48491	0.0747368	1.2	48	0	3	9.99	21.2478	0.203637	12	0	35
49	2016	1.94591	2.94444	0.0747368	12	49	0	3	8.4	21.2602	0.212617	12	0	35
49	2017	2.48491	2.07944	0.0747368	15	50	0	3	6.5	21.2291	0.1954	12	0	35
49	2018	1.94591	1.38629	0.0747368	14	51	0	3	7.41	21.1463	0.145606	12	0	35
49	2019	1.09861	1.94591	0.0747368	18	52	0	3	8.48	21.1793	0.17096	12	0	35
49	2020	0	1.79176	0.0747368	0.69	53	0	3	13.9	21.1863	0.25291	12	0	35
50	2015	0	0	0.228892	22	51	0	4	3.54	21.642	0.108643	12	1	27
50	2016	0	0	0.228892	27	52	0	4	7.07	21.6517	0.0900504	12	1	27
50	2017	0.693147	0	0.228892	24	53	0	4	6.17	21.8993	0.183387	12	1	27
50	2018	0	0	0.228892	24	54	0	4	3.07	21.947	0.20745	12	1	27
50	2019	0	0	0.228892	-1.7	55	0	4	4.32	21.8021	0.269818	12	1	27
50	2020	0	1.94591	0.228892	25	56	0	4	4.28	21.8726	0.212067	12	1	27
51	2015	0	0	0.267382	26	48	1	4	5.83	21.3602	0.0784091	12	0	39
51	2016	0	0	0.267382	23	49	1	4	7.26	21.3867	0.0863729	12	0	39
51	2017	0	0	0.267382	24	50	1	4	6.41	21.4216	0.113059	12	0	39
51	2018	0	0	0.267382	22	51	1	4	6.99	21.4111	0.097596	12	0	39
51	2019	0	0	0.267382	23	52	1	4	6.7	21.5193	0.153642	12	0	39
51	2020	0	0	0.267382	25	53	1	4	6.16	21.6788	0.204122	12	0	39
52	2015	0.693147	1.09861	0.466155	17	35	1	3	3.37	21.8995	0.372048	12	0	36
52	2016	0	1.79176	0.466155	15	36	1	3	3.39	22.1024	0.467796	12	0	36
52	2017	0	0.693147	0.466155	15	37	1	3	3.02	22.1779	0.486563	12	0	36
52	2018	0.693147	0.693147	0.466155	2.7	38	1	3	3.11	22.3135	0.40375	12	0	36
52	2019	0	1.38629	0.466155	-2.6	39	1	3	2.72	22.3015	0.388508	12	0	36
52	2020	0	1.09861	0.466155	2.9	40	0	3	2.97	22.1801	0.40322	12	0	36
53	2015	3.7612	2.56495	0.139251	25	51	0	5	15	20.5615	0.119788	12	0	39
53	2016	4.18965	3.04452	0.139251	18	52	0	5	13.5	20.66	0.166682	12	0	39
53	2017	3.21888	2.77259	0.139251	19	53	0	5	13.1	20.7894	0.205834	12	0	39
53	2018	3.17805	3.17805	0.139251	19	54	0	5	13.8	20.8712	0.235954	12	0	39
53	2019	2.48491	3.43399	0.139251	14	55	0	5	11.3	20.9863	0.263904	12	0	39
53	2020	2.63906	3.3673	0.139251	23	56	0	5	9.96	21.4644	0.202466	12	0	39
54	2015	0	0.693147	0.321226	18	47	1	3	2.93	21.5057	0.347157	12	0	36
54	2016	0	2.19722	0.321226	18	48	1	3	3.03	21.7173	0.284221	12	0	36
54	2017	0.693147	2.30259	0.321226	16	49	1	3	3.11	21.9159	0.300395	12	0	36
54	2018	0.693147	1.38629	0.321226	20	50	1	3	3.02	21.9602	0.310636	12	0	36
54	2019	0.693147	2.30259	0.321226	21	51	1	3	3.15	21.9581	0.294101	12	0	36
54	2020	1.09861	2.30259	0.321226	25	52	1	3	3.17	21.8958	0.292144	12	0	36
55	2015	1.09861	1.38629	0.218696	15	45	0	3	6.62	21.2158	0.243313	12	0	38
55	2016	0	2.07944	0.218696	19	46	0	3	9.16	21.6993	0.0973754	12	0	38
55	2017	0.693147	1.79176	0.218696	15	47	0	3	11.2	21.7065	0.112749	12	0	38
55	2018	0	2.48491	0.218696	21	48	0	3	10.1	21.6582	0.124445	12	0	38
55	2019	0.693147	0.693147	0.218696	17	49	0	3	9.24	21.6967	0.184374	12	0	38
55	2020	1.38629	1.94591	0.218696	18	50	0	3	8.29	21.9611	0.352507	12	0	38
56	2015	0.693147	0	0.419142	18	55	0	2	4.2	20.9081	0.0694072	12	0	27
56	2016	0	0	0.419142	23	56	0	2	3.97	20.9649	0.0755643	12	0	27
56	2017	0.693147	0	0.419142	25	57	0	2	3.14	21.1806	0.148888	12	0	27
56	2018	0.693147	0	0.419142	28	58	0	2	2.43	21.3803	0.167499	12	0	27
56	2019	1.09861	0	0.419142	23	59	0	2	3.97	21.3692	0.131633	12	0	27
56	2020	0	1.79176	0.419142	22	60	0	2	3.98	21.4951	0.161723	12	0	27
57	2015	1.79176	4.83628	0.14307	21	53	1	3	4.06	22.1217	0.415285	12	0	34
57	2016	2.19722	4.34381	0.14307	19	54	1	3	4.04	22.3736	0.324042	12	0	34
57	2017	1.09861	3.7612	0.14307	23	55	1	3	3.86	22.4478	0.325331	12	0	34
57	2018	1.38629	3.43399	0.14307	14	56	1	3	3.84	22.4294	0.42173	12	0	34
57	2019	0	3.97029	0.14307	24	57	1	3	4.1	22.4802	0.486266	12	0	34
57	2020	0.693147	4.41884	0.14307	28	58	1	3	4.2	22.5613	0.519154	12	0	34
58	2015	3.46574	3.85015	0.2807	28	43	0	4	11.6	21.8503	0.318323	12	1	39
58	2016	3.78419	3.89182	0.2807	31	44	0	4	11.6	22.0847	0.31646	12	1	39
58	2017	3.21888	4.21951	0.2807	27	45	0	4	12.3	22.1231	0.288985	12	1	39
58	2018	2.99573	5.46806	0.2807	29	46	0	4	12.7	22.2678	0.257604	12	1	39
58	2019	3.13549	5.61677	0.2807	24	47	0	4	16.6	22.5096	0.351904	12	1	39
58	2020	3.68888	5.3845	0.2807	20	48	0	4	15.4	22.5016	0.339495	12	1	39
59	2015	1.94591	2.19722	0.145701	23	55	0	4	11.4	20.9509	0.211579	12	0	38
59	2016	1.60944	2.56495	0.145701	21	56	0	4	10.3	21.5351	0.120763	12	0	38
59	2017	1.79176	2.30259	0.145701	24	57	0	4	11.5	21.6042	0.142944	12	0	38
59	2018	2.19722	2.70805	0.145701	25	58	0	4	11.2	21.6184	0.148033	12	0	38
59	2019	1.79176	1.79176	0.145701	24	59	0	4	10.7	21.736	0.179156	12	0	65
59	2020	2.56495	2.19722	0.145701	24	60	0	4	10.6	21.8338	0.223052	12	0	65
60	2015	0	1.38629	0.146442	17	51	1	4	16.9	21.6355	0.262028	12	1	39
60	2016	1.09861	1.60944	0.146442	22	52	1	4	14.4	22.3132	0.270369	12	1	39
60	2017	0	1.09861	0.146442	20	53	1	4	10.2	22.8428	0.546599	12	1	39
60	2018	1.09861	1.79176	0.146442	8.3	54	1	4	13.1	22.991	0.590634	12	1	39
60	2019	0.693147	2.48491	0.146442	3.9	55	1	4	15.9	22.8693	0.656472	12	1	39
60	2020	1.38629	2.07944	0.146442	7.3	56	1	4	14.8	22.7066	0.754521	12	1	39
61	2015	2.30259	3.3673	0.192828	8.4	39	0	3	3.26	22.6566	0.606763	12	0	33
61	2016	2.07944	2.19722	0.192828	11	40	0	3	2.03	23.4405	0.784822	12	0	33
61	2017	1.38629	1.38629	0.192828	15	41	0	3	2.7	23.8195	0.647614	12	0	33
61	2018	1.09861	2.70805	0.192828	17	42	0	3	2.4	24.1616	0.729067	12	0	39
61	2019	0.693147	2.3979	0.192828	15	43	0	3	3.29	24.1786	0.725376	12	0	39
61	2020	0	0.693147	0.192828	21	44	0	3	3.24	24.3477	0.648696	12	0	39
62	2015	1.79176	1.79176	0.283865	63	50	0	5	14.5	22.3992	0.368538	12	1	39
62	2016	2.83321	2.99573	0.283865	61	51	0	5	13.9	22.4724	0.356386	12	1	39
62	2017	2.3979	1.38629	0.283865	17	52	0	5	12.9	22.5858	0.417781	12	1	39
62	2018	2.48491	1.09861	0.283865	24	52	0	5	11.7	22.669	0.39073	12	1	39
62	2019	2.77259	1.38629	0.283865	21	53	0	5	13.3	22.7581	0.367828	12	1	39
62	2020	0.693147	0.693147	0.283865	13	54	0	5	13.2	22.8884	0.439785	12	1	39
63	2015	0.693147	0	0.292387	33	56	0	3	4.63	23.2221	0.277392	12	0	27
63	2016	0.693147	0	0.292387	30	57	0	3	3.09	23.2815	0.373642	12	0	27
63	2017	0	0	0.292387	3.8	58	0	3	3.1	23.3027	0.417215	12	0	27
63	2018	1.09861	0	0.292387	26	59	0	3	3.94	23.3335	0.546647	12	0	27
63	2019	0	0	0.292387	31	60	0	3	3.45	23.4473	0.509841	12	0	27
63	2020	0	0	0.292387	31	60	0	3	3.08	23.6691	0.385627	12	0	27
64	2015	2.56495	1.60944	0.225296	21	52	1	4	7.09	21.0581	0.283118	12	0	39
64	2016	1.60944	1.79176	0.225296	16	53	1	4	5.77	21.1926	0.327384	12	0	39
64	2017	0	2.48491	0.225296	17	54	1	4	4.75	21.4664	0.360822	12	0	39
64	2018	1.60944	4.09434	0.225296	17	55	1	4	4.71	22.0096	0.536123	12	0	39
64	2019	1.38629	5.32301	0.225296	19	56	1	4	4.75	22.2368	0.520651	12	0	39
64	2020	3.2581	4.49981	0.225296	22	57	1	4	5.41	22.547	0.466887	12	0	39
65	2015	2.89037	0	0.293179	68	40	0	3	38.8	22.0392	0.204907	12	1	65
65	2016	3.13549	0.693147	0.293179	67	41	0	3	38.8	22.1397	0.230614	12	1	65
65	2017	3.04452	0	0.293179	29	42	0	3	38.8	23.0055	0.298499	12	1	65
65	2018	2.89037	1.38629	0.293179	33	43	0	3	38.8	22.9441	0.196669	12	1	65
65	2019	2.99573	1.94591	0.293179	6.8	44	0	3	38.8	22.9267	0.117525	12	1	65
65	2020	3.73767	2.48491	0.293179	5.3	45	0	3	38.8	22.9431	0.143163	12	1	65
66	2015	0	0	0.283522	21	52	0	2	3.71	21.0456	0.0918854	12	0	27
66	2016	1.09861	0	0.283522	27	53	0	4	4.69	21.2387	0.248378	12	0	27
66	2017	0	0	0.283522	19	54	0	4	3.72	21.2541	0.282978	12	0	27
66	2018	0	0	0.283522	21	55	0	4	4.13	21.3101	0.241896	12	0	27
66	2019	0	0	0.283522	24	56	0	4	3.79	21.3561	0.187438	12	0	27
66	2020	0.693147	0	0.283522	18	57	1	4	4.27	21.3591	0.155626	12	0	27
67	2015	3.2581	5.73334	0.334446	31	51	0	4	6.82	24.135	0.363466	12	1	39
67	2016	3.17805	5.53733	0.334446	67	52	0	4	7.62	24.4451	0.407662	12	1	39
67	2017	4.02535	5.74939	0.334446	31	53	0	4	8.11	24.6662	0.406563	12	1	39
67	2018	4.23411	6.08677	0.334446	30	54	0	4	8.99	24.8741	0.401992	12	1	39
67	2019	5.07517	6.43775	0.334446	31	55	0	4	9.51	25.0455	0.396576	12	1	39
67	2020	5.82305	5.81413	0.334446	30	56	0	4	10	25.2085	0.385809	12	1	39
68	2015	0.693147	1.94591	0.240534	25	52	1	4	3.72	22.3009	0.448126	12	0	65
68	2016	1.94591	2.48491	0.240534	26	53	1	4	3.74	22.2982	0.383992	12	0	65
68	2017	2.19722	2.63906	0.240534	25	54	1	4	4.08	22.4202	0.401747	12	0	65
68	2018	2.07944	2.56495	0.240534	23	55	1	4	4.89	22.635	0.508261	12	0	65
68	2019	3.29584	0	0.240534	4.8	56	1	4	4.6	22.5862	0.551582	12	0	65
68	2020	3.09104	1.60944	0.240534		57	1	4	3.96	22.8018	0.601756	12	0	65
69	2015	2.3979	5.87493	0.463688	25	33	0	4	6.42	23.8405	0.50566	12	0	27
69	2016	2.83321	5.07517	0.463688	63	33	0	4	7.16	23.8764	0.510192	12	0	27
69	2017	2.99573	4.46591	0.463688	26	34	0	4	7.4	24.055	0.571874	12	0	27
69	2018	2.56495	4.34381	0.463688	20	35	0	4	6.81	24.1029	0.558456	12	0	27
69	2019	1.79176	4.44265	0.463688	27	36	0	4	7.66	24.1728	0.558333	12	0	27
69	2020	1.79176	4.29046	0.463688	25	37	0	4	9.21	24.1885	0.562173	12	0	27
70	2015	1.60944	0.693147	0.380233	27	46	0	1	1.67	22.0691	0.302104	12	0	27
70	2016	1.38629	0	0.380233	26	47	0	1	3.36	22.1669	0.276352	12	0	27
70	2017	1.09861	0.693147	0.380233	26	48	0	1	2.85	22.2966	0.281063	12	0	27
70	2018	1.09861	0.693147	0.380233	25	49	0	1	1.61	22.5111	0.343281	12	0	27
70	2019	1.09861	2.07944	0.380233	28	50	0	1	2.02	22.6761	0.413224	12	0	27
70	2020	1.09861	0	0.380233	20	51	0	1	1.69	22.6739	0.442575	12	0	27
71	2015	2.56495	2.30259	0.182178	17	52	0	4	2.55	22.9986	0.578367	12	1	35
71	2016	2.07944	1.79176	0.182178	3.6	53	0	4	2.54	23.0172	0.6234	12	1	35
71	2017	1.60944	1.09861	0.182178	21	54	0	4	2.13	23.1292	0.548074	12	1	35
71	2018	1.09861	2.48491	0.182178	26	55	0	4	2.67	23.1522	0.496552	12	1	35
71	2019	0.693147	2.56495	0.182178	25	56	0	4	3.43	23.2123	0.484755	12	1	35
71	2020	1.79176	2.99573	0.182178	26	57	0	4	3.05	23.3929	0.526703	12	1	35
72	2015	0.693147	1.79176	0.442367	17	38	0	5	1.01	22.4929	0.231544	12	0	27
72	2016	0	1.38629	0.442367	18	39	0	5	1.01	22.6518	0.310655	12	0	27
72	2017	0	2.3979	0.442367	17	40	0	5	1.01	22.8219	0.383593	12	0	27
72	2018	0	1.79176	0.442367	20	41	0	5	1.01	22.8837	0.386909	12	0	27
72	2019	0	2.19722	0.442367	18	42	1	5	1.01	22.8986	0.387049	12	0	27
72	2020	0	0	0.442367	18	43	1	5	1.01	22.929	0.402776	12	0	27
73	2015	1.09861	3.85015	0.214464	15	47	1	3	5.61	22.057	0.401911	12	0	39
73	2016	2.89037	3.98898	0.214464	17	48	1	3	6.39	22.1704	0.423144	12	0	39
73	2017	3.91202	3.73767	0.214464	16	49	1	3	5.61	22.2129	0.441878	12	0	39
73	2018	4.14313	4.02535	0.214464	18	50	1	3	5.17	22.2772	0.439399	12	0	39
73	2019	4.00733	3.8712	0.214464	19	51	1	3	5.2	22.3721	0.429646	12	0	39
73	2020	3.95124	3.52636	0.214464	22	52	1	3	5.92	22.542	0.419398	12	0	39
74	2015	2.07944	1.38629	0.180682	28	47	1	5	20.8	21.7627	0.363595	12	0	64
74	2016	2.3979	0.693147	0.180682	28	48	1	5	22.3	21.9034	0.305862	12	0	64
74	2017	2.19722	0	0.180682	24	49	1	5	20.6	22.1761	0.256886	12	0	64
74	2018	2.07944	0	0.180682	26	50	1	5	21.7	22.3125	0.260549	12	0	64
74	2019	3.43399	0	0.180682	27	51	1	5	19.6	22.6542	0.366637	12	0	64
74	2020	2.56495	0	0.180682	29	52	1	5	18	22.8475	0.28304	12	0	65
75	2015	2.07944	2.77259	0.223982	24	50	0	3	5.02	21.677	0.207593	12	0	36
75	2016	2.30259	2.63906	0.223982	23	51	0	3	4.73	21.7325	0.191519	12	0	36
75	2017	2.89037	2.83321	0.223982	23	52	0	3	4.9	22.0646	0.361605	12	0	36
75	2018	2.07944	2.94444	0.223982	22	53	0	3	5.52	22.1449	0.338426	12	0	36
75	2019	2.19722	2.70805	0.223982	17	54	0	3	6.36	22.1538	0.357999	12	0	36
75	2020	1.38629	2.48491	0.223982	19	55	0	3	6.06	22.3278	0.407548	12	0	36
76	2015	1.60944	3.3322	0.197241	23	42	0	5	4.65	22.2031	0.32946	12	1	39
76	2016	1.60944	3.46574	0.197241	23	43	0	5	4.21	22.4595	0.485358	12	1	39
76	2017	1.60944	3.93183	0.197241	25	44	0	5	4.62	22.5591	0.494003	12	1	39
76	2018	1.60944	3.78419	0.197241	27	46	0	5	4.55	22.5329	0.434513	12	1	39
76	2019	2.30259	4.56435	0.197241	26	46	0	5	3.6	22.6152	0.45005	12	1	39
76	2020	2.63906	3.3322	0.197241	13	47	0	5	4.09	22.4679	0.379216	12	1	39
77	2015	0	2.63906	0.221464	20	36	0	4	3.1	21.3235	0.323951	12	0	38
77	2016	1.79176	1.79176	0.221464	19	37	0	4	3.78	21.7696	0.534003	12	0	38
77	2017	1.09861	1.09861	0.221464	17	38	0	4	4.59	21.7838	0.517493	12	0	38
77	2018	0	1.79176	0.221464	-0.53	39	0	4	5.39	21.6141	0.53271	12	0	38
77	2019	0.693147	1.94591	0.221464	19	40	0	4	4.93	21.8043	0.569637	12	0	38
77	2020	0.693147	3.2581	0.221464	23	41	0	4	4.35	22.0087	0.593944	12	0	38
78	2015	2.48491	2.48491	0.40731	26	43	0	3	5.18	22.198	0.387265	12	0	36
78	2016	1.94591	3.3673	0.40731	22	44	0	3	4.77	22.2945	0.39265	12	0	36
78	2017	1.94591	3.21888	0.40731	23	46	0	3	4.8	22.5405	0.452687	12	0	36
78	2018	1.38629	3.66356	0.40731	21	47	0	3	6.43	22.4984	0.39298	12	0	36
78	2019	0.693147	3.63759	0.40731	19	48	0	3	6.22	22.4824	0.357762	12	0	36
78	2020	1.09861	2.99573	0.40731	21	49	0	3	6.06	22.6025	0.377327	12	0	36
79	2015	1.09861	1.79176	0.12997	37	49	1	4	14.9	21.3685	0.275122	12	0	65
79	2016	2.07944	1.60944	0.12997	37	50	1	4	13.1	21.4818	0.338254	12	0	65
79	2017	1.38629	1.79176	0.12997	13	51	1	4	15	21.6761	0.446749	12	0	65
79	2018	0.693147	1.09861	0.12997	16	52	1	4	12.8	21.6505	0.420882	12	0	65
79	2019	1.38629	0.693147	0.12997	13	53	1	4	13.6	21.738	0.438822	12	0	65
79	2020	1.09861	0.693147	0.12997	14	54	1	4	14.8	21.7834	0.449009	12	0	65
80	2015	0.693147	2.30259	0.210437	21	49	1	6	5.74	23.1732	0.492626	12	0	39
80	2016	1.38629	3.52636	0.210437	74	50	1	6	6.77	23.7656	0.42114	12	0	39
80	2017	0.693147	3.80666	0.210437	19	51	1	6	6.76	24.0149	0.482074	12	0	39
80	2018	0.693147	3.29584	0.210437	21	52	1	6	7.01	24.319	0.542421	12	0	39
80	2019	0	2.30259	0.210437	24	53	1	6	7	24.6228	0.559526	12	0	39
80	2020	1.38629	2.30259	0.210437	23	54	1	6	6.21	24.9719	0.558558	12	0	39
81	2015	1.60944	0.693147	0.311914	0.6	49	1	3	7.23	22.2276	0.411788	12	0	34
81	2016	1.38629	0	0.311914	24	50	1	3	6.4	22.2629	0.392913	12	0	34
81	2017	0.693147	0.693147	0.311914	24	51	1	3	7.24	22.1952	0.340175	12	0	34
81	2018	0.693147	0	0.311914	21	52	1	3	7.9	22.2374	0.348598	12	0	34
81	2019	0.693147	0.693147	0.311914	22	53	1	3	8.14	22.3995	0.435757	12	0	34
81	2020	0	0.693147	0.311914	17	54	1	3	4.29	22.7372	0.461823	12	0	34
82	2015	0	0.693147	0.253933	20	52	0	2	6.37	21.4417	0.135082	12	0	39
82	2016	1.09861	2.70805	0.253933	20	53	0	2	5.61	21.9697	0.114889	12	0	39
82	2017	1.09861	1.94591	0.253933	20	54	0	2	4.75	22.0708	0.160756	12	0	39
82	2018	2.07944	3.13549	0.253933	19	54	0	2	5.17	22.1237	0.152603	12	0	39
82	2019	1.09861	2.70805	0.253933	19	56	0	2	5.88	22.2276	0.200866	12	0	39
82	2020	1.09861	2.48491	0.253933	21	57	0	2	5.86	22.365	0.236049	12	0	39
83	2015	0	1.38629	0.122698	24	46	0	3	3.61	22.5502	0.334025	12	0	38
83	2016	0.693147	0.693147	0.122698	77	47	0	3	4.18	22.5853	0.310281	12	0	38
83	2017	0	1.09861	0.122698	19	48	0	3	4.63	22.5518	0.255354	12	0	38
83	2018	0.693147	3.09104	0.122698	19	49	0	3	4.13	22.6169	0.292313	12	0	38
83	2019	0.693147	1.60944	0.122698	20	50	0	3	5.16	22.5732	0.205287	12	0	38
83	2020	0.693147	2.19722	0.122698	21	51	0	3	5.79	22.7399	0.247246	12	0	38
84	2015	1.09861	3.66356	0.251852	75	33	0	3	3.31	22.338	0.370099	12	0	38
84	2016	1.60944	0.693147	0.251852	71	33	0	3	3.36	22.5819	0.356958	12	0	38
84	2017	2.30259	4.8752	0.251852	32	34	0	3	3.32	22.7935	0.336732	12	0	38
84	2018	2.30259	5.72031	0.251852	32	35	0	3	3.95	22.9698	0.351601	12	0	38
84	2019	2.48491	6.00635	0.251852	31	36	0	3	3.86	23.089	0.345256	12	0	38
84	2020	2.70805	6.00389	0.251852	30	37	0	3	3.73	23.2456	0.342265	12	0	38
85	2015	0	1.94591	0.334418	14	46	0	4	5.36	22.3388	0.433609	12	0	39
85	2016	0	0.693147	0.334418	14	47	0	4	4.3	22.5777	0.531042	12	0	39
85	2017	0	1.38629	0.334418	13	48	0	4	5.41	22.79	0.602472	12	0	39
85	2018	0	2.07944	0.334418	-1.1	49	1	4	6.94	22.4808	0.784822	12	0	39
85	2019	0	0.693147	0.334418	14	50	1	4	7.12	22.4225	0.757126	12	0	39
85	2020	0	0	0.334418	10	51	1	4	11.8	22.1989	0.689681	12	0	39
86	2015	1.09861	2.77259	0.184472	27	53	1	4	5.21	21.6494	0.300407	12	0	38
86	2016	2.19722	2.3979	0.184472	27	54	1	4	4.82	21.7606	0.292435	12	0	38
86	2017	2.30259	2.70805	0.184472	25	55	1	4	4.68	22.0625	0.405427	12	0	38
86	2018	0	2.48491	0.184472	23	56	1	4	5.18	21.9879	0.315283	12	0	38
86	2019	0.693147	1.09861	0.184472	24	57	1	4	6.05	22.1237	0.352885	12	0	38
86	2020	0.693147	2.3979	0.184472	23	58	1	4	6.84	22.1426	0.319573	12	0	38
87	2015	0.693147	3.29584	0.37114	20	55	1	3	6.53	21.6118	0.295359	12	0	34
87	2016	2.07944	1.38629	0.37114	17	55	1	3	7.55	21.5783	0.265839	12	0	34
87	2017	2.3979	0	0.37114	22	56	1	3	7.92	21.691	0.318323	12	0	34
87	2018	0	2.07944	0.37114	26	57	0	3	4.36	22.4708	0.486632	12	0	34
87	2019	0	1.09861	0.37114	23	59	0	3	4.11	22.4851	0.509299	12	0	34
87	2020	0	1.09861	0.37114	21	60	0	3	4.02	22.5703	0.543112	12	0	34
88	2015	1.60944	1.09861	0.207219	-3	54	0	3	3.36	21.8005	0.397984	12	0	35
88	2016	0	2.3979	0.207219	7.7	55	0	3	2.15	21.7029	0.333086	12	0	35
88	2017	0	2.19722	0.207219	14	56	0	3	1.53	21.8419	0.23695	12	0	35
88	2018	0	1.94591	0.207219	17	57	0	3	2.15	21.8785	0.214281	12	0	35
88	2019	0	0	0.207219	20	58	0	3	2.27	21.947	0.212468	12	0	35
88	2020	0.693147	0	0.207219	17	59	0	3	2.88	21.9684	0.201983	12	0	35
89	2015	1.60944	1.79176	0.387218	21	55	0	2	6.33	21.817	0.406436	11	0	36
89	2016	1.38629	3.4012	0.387218	18	56	0	2	6.49	21.777	0.354532	11	0	36
89	2017	1.09861	1.09861	0.387218	25	57	0	2	6.36	21.8789	0.351052	11	0	36
89	2018	1.94591	2.19722	0.387218	25	58	0	2	6.59	22.038	0.40802	11	0	36
89	2019	0	2.63906	0.387218	3.8	59	0	2	6.96	22.0862	0.459798	11	0	36
89	2020	0	1.38629	0.387218	14	60	0	2	6.6	22.0904	0.44041	11	0	36
90	2015	2.48491	4.07754	0.225966	80	36	0	3	3.93	22.1716	0.337139	11	0	38
90	2016	2.3979	3.80666	0.225966	77	38	0	3	3.52	22.3506	0.425766	11	0	38
90	2017	2.56495	4.14313	0.225966	26	39	0	3	3.39	22.5966	0.512199	11	0	38
90	2018	1.79176	5.03044	0.225966	27	40	0	3	3.46	22.6401	0.493057	11	0	38
90	2019	1.60944	4.41884	0.225966	27	41	0	3	4.15	22.6639	0.438461	11	0	38
90	2020	2.07944	4.99043	0.225966	26	42	0	3	3.78	22.778	0.478477	11	0	38
91	2015	1.60944	2.30259	0.134953	19	52	1	3	2.49	21.8079	0.465433	11	0	35
91	2016	1.38629	2.19722	0.134953	21	53	1	3	2.36	22.124	0.465051	11	0	35
91	2017	0	1.09861	0.134953	21	55	1	3	2.53	22.1843	0.379824	11	0	35
91	2018	1.09861	0	0.134953	18	55	1	6	2.84	22.1354	0.323289	11	0	35
91	2019	0	1.38629	0.134953	6.3	56	1	6	3.13	22.2751	0.403373	11	0	35
91	2020	0	1.09861	0.134953	14	57	1	6	2.7	22.3449	0.279751	11	0	35
92	2015	1.38629	2.77259	0.194784	23	47	0	4	6.28	21.4355	0.283019	11	0	34
92	2016	1.94591	3.04452	0.194784	24	48	0	4	5.76	21.5023	0.272819	11	0	34
92	2017	1.38629	3.78419	0.194784	23	49	1	4	5.82	21.5617	0.292457	11	0	34
92	2018	1.94591	3.80666	0.194784	23	50	1	4	6.66	21.594	0.301434	11	0	34
92	2019	1.38629	2.83321	0.194784	19	51	1	4	7.44	21.817	0.376268	11	0	34
92	2020	0.693147	2.77259	0.194784	22	52	1	4	7.38	22.0448	0.458932	11	0	34
93	2015	0	1.79176	0.265733	15	48	0	3	1.15	21.5688	0.293239	11	0	38
93	2016	0	2.19722	0.265733	14	49	0	3	3.01	21.6737	0.329748	11	0	38
93	2017	0	1.79176	0.265733	9.8	50	0	3	2.86	21.6258	0.336095	11	0	38
93	2018	0	1.38629	0.265733	12	51	0	3	1.63	21.7842	0.433011	11	0	38
93	2019	0	2.07944	0.265733	12	52	0	3	3.26	21.8152	0.411213	11	0	38
93	2020	0.693147	2.3979	0.265733	16	53	0	3	3.32	21.925	0.280512	11	0	38
94	2015	0.693147	0	0.197678	16	49	1	2	3.33	21.4455	0.17194	11	0	26
94	2016	1.09861	0	0.197678	23	50	1	2	4.59	21.5912	0.259398	11	0	26
94	2017	0.693147	1.38629	0.197678	27	51	1	2	4.25	21.966	0.340402	11	0	26
94	2018	0	3.21888	0.197678	21	52	1	2	5.53	21.9992	0.36938	11	0	27
94	2019	0	1.94591	0.197678	11	53	1	2	5.6	22.1842	0.46243	11	0	27
94	2020	1.60944	2.83321	0.197678	13	54	1	2	3.64	22.4019	0.435156	11	0	27
95	2015	0	0	0.295209	18	58	0	3	3.87	21.6917	0.337411	11	0	27
95	2016	0	0	0.295209	18	59	0	3	2.88	21.7056	0.325632	11	0	27
95	2017	0	0	0.295209	9.5	60	0	3	3.23	21.6991	0.28506	11	0	27
95	2018	0	0	0.295209	17	61	0	3	3.59	21.6606	0.23011	11	0	27
95	2019	0	1.09861	0.295209	19	62	0	3	3.51	21.6382	0.17571	11	0	27
95	2020	1.09861	0	0.295209	20	63	0	3	3.94	21.7515	0.237425	11	0	27
96	2015	2.77259	4.11087	0.162596	3	45	1	3	10.5	21.239	0.2696	11	0	39
96	2016	2.77259	2.48491	0.162596	24	46	1	3	7.45	20.9922	0.114533	11	0	39
96	2017	2.70805	3.55535	0.162596	12	47	1	3	5.43	20.9866	0.103882	11	0	39
96	2018	1.79176	2.3979	0.162596	-6.9	48	1	3	4.69	20.9947	0.110766	11	0	39
96	2019	0	2.70805	0.162596	-3.3	49	1	3	4.28	20.8244	0.0936017	11	0	39
96	2020	0.693147	2.07944	0.162596	23	50	1	3	3.54	20.8846	0.0998554	11	0	39
97	2015	0	1.60944	0.322688	20	38	0	4	3.01	21.4583	0.594567	11	0	36
97	2016	0	3.29584	0.322688	20	39	0	4	3.1	21.8852	0.44551	11	0	36
97	2017	1.38629	3.17805	0.322688	21	40	1	4	3.4	21.9747	0.458477	11	0	36
97	2018	1.60944	3.58352	0.322688	-2.9	41	1	4	3.91	21.9677	0.471903	11	0	36
97	2019	1.09861	3.78419	0.322688	16	43	1	4	4.32	21.9997	0.449323	11	0	36
97	2020	1.38629	3.49651	0.322688	22	43	1	4	3.85	22.0248	0.455196	11	0	36
98	2015	0	1.38629	0.0819383	19	51	1	2	3.57	21.8127	0.411487	11	0	36
98	2016	0	1.79176	0.0819383	21	52	1	2	4.42	21.9744	0.480659	11	0	36
98	2017	0.693147	1.94591	0.0819383	18	53	1	2	4.32	22.0549	0.511173	11	0	36
98	2018	0.693147	1.09861	0.0819383	16	54	1	2	3.52	22.094	0.517622	11	0	36
98	2019	0	1.94591	0.0819383	19	55	1	2	3.16	22.0996	0.512399	11	0	36
98	2020	0	2.48491	0.0819383	19	56	1	2	3.04	22.1799	0.54094	11	0	36
99	2015	6.11589	6.20658	0.263196	68	50	1	4	4.59	25.4724	0.68802	11	0	36
99	2016	6.18002	5.85507	0.263196	74	51	1	4	4.37	25.7005	0.618053	11	0	36
99	2017	6.00635	6.45834	0.263196	18	52	1	4	5.92	25.9056	0.663348	11	0	36
99	2018	6.00141	6.75926	0.263196	19	53	1	4	6.56	25.9684	0.688063	11	0	36
99	2019	6.18002	6.70319	0.263196	16	54	1	4	6.59	25.9684	0.68002	11	0	36
99	2020	6.18002	6.76964	0.263196		55	1	4	5.46	25.9684	0.679361	11	0	36
100	2015	1.09861	1.79176	0.331431	23	51	0	3	5.17	20.7053	0.228148	11	1	34
100	2016	0.693147	0.693147	0.331431	22	52	0	3	5.17	20.7532	0.270509	11	1	34
100	2017	0.693147	1.60944	0.331431	14	53	0	3	3.84	20.8216	0.312971	11	1	34
100	2018	0.693147	2.48491	0.331431	21	54	0	3	4.02	21.0493	0.38515	11	1	34
100	2019	0	1.94591	0.331431	21	55	0	3	3.96	21.0409	0.369807	11	1	34
100	2020	0	2.89037	0.331431	15	56	0	3	4.77	21.2002	0.436071	11	1	34
101	2015	0	1.94591	0.295519	20	45	0	3	3.4	22.3468	0.21249	11	0	36
101	2016	0.693147	1.38629	0.295519	21	46	0	3	4.72	22.4287	0.200676	11	0	36
101	2017	0	1.09861	0.295519	24	47	0	3	4.15	22.5817	0.20528	11	0	36
101	2018	0	0	0.295519	17	48	0	3	2.73	23.5414	0.17088	11	0	36
101	2019	0	0	0.295519	21	49	0	3	9.06	24.2002	0.231476	11	0	65
101	2020	0	0	0.295519	23	50	0	3	9.99	24.4786	0.299412	11	0	65
102	2015	1.60944	3.85015	0.260333	25	40	0	4	6.83	22.465	0.15412	11	0	27
102	2016	1.09861	1.09861	0.260333	26	41	0	4	6.27	22.5559	0.146842	11	0	27
102	2017	2.48491	1.09861	0.260333	24	42	0	4	6.29	22.7885	0.098332	11	0	27
102	2018	2.19722	4.26268	0.260333	26	43	0	4	6.29	22.87	0.116108	11	0	27
102	2019	1.79176	3.17805	0.260333	25	44	0	4	8.84	22.9282	0.123145	11	0	27
102	2020	2.3979	4.09434	0.260333	34	45	0	4	8.39	23.1649	0.223539	11	0	27
103	2015	2.83321	2.89037	0.173645	32	38	0	2	6.53	20.9496	0.223049	11	0	65
103	2016	3.4012	1.79176	0.173645	32	39	0	2	6.49	21.6217	0.148224	11	0	65
103	2017	3.04452	2.07944	0.173645	29	40	0	2	8.01	21.6906	0.137649	11	0	65
103	2018	2.89037	2.77259	0.173645	29	41	0	3	13.3	21.6625	0.198324	11	0	65
103	2019	2.48491	3.13549	0.173645	24	42	0	3	11.3	21.7367	0.228291	11	0	65
103	2020	2.19722	2.70805	0.173645	30	43	0	3	9.49	21.8743	0.269678	11	0	65
104	2015	0	2.56495	0.376188	19	43	0	4	2.14	21.6352	0.561926	11	0	35
104	2016	0	1.38629	0.376188	20	44	0	4	3.54	21.8467	0.442447	11	0	35
104	2017	2.30259	2.19722	0.376188	21	45	0	4	2.43	23.244	0.379893	11	0	35
104	2018	1.38629	3.29584	0.376188	1.1	46	0	4	3.46	22.919	0.551325	11	0	38
104	2019	0.693147	3.3673	0.376188	22	47	0	4	1.7	22.5596	0.298307	11	0	38
104	2020	0	1.38629	0.376188	17	49	0	4	3.38	22.5675	0.330797	11	0	35
105	2015	2.3979	3.4012	0.196606	10	33	0	3	9.88	21.3882	0.172629	11	0	35
105	2016	2.89037	2.30259	0.196606	14	33	0	3	7.7	21.3948	0.173227	11	0	35
105	2017	1.38629	2.48491	0.196606	4.4	34	0	3	6.29	21.4759	0.238794	11	0	35
105	2018	0	2.99573	0.196606		35	0	3	7.13	21.3962	0.201169	11	0	35
105	2019	1.09861	2.07944	0.196606	9.4	36	0	3	5.98	21.406	0.197548	11	0	35
105	2020	0.693147	2.3979	0.196606	17	37	0	3	6.03	21.4684	0.241406	11	0	35
106	2015	1.79176	4.18965	0.20715	21	47	1	3	4.64	22.0905	0.405232	11	0	35
106	2016	1.60944	3.82864	0.20715	21	48	1	3	3.91	22.2044	0.418534	11	0	35
106	2017	2.30259	4.43082	0.20715	20	49	1	3	3.13	22.3017	0.395796	11	0	35
106	2018	0.693147	4.63473	0.20715	23	50	1	3	3.37	22.5086	0.446007	11	0	35
106	2019	1.38629	5.06259	0.20715	23	51	1	3	4.3	22.5486	0.442869	11	0	35
106	2020	2.63906	5.10595	0.20715	25	52	1	3	3.81	22.922	0.468906	11	0	38
107	2015	2.07944	3.43399	0.357674	35	40	0	3	3.69	21.8507	0.243597	11	0	39
107	2016	2.77259	3.21888	0.357674	65	41	0	3	4.01	21.9038	0.201834	11	0	39
107	2017	1.60944	2.30259	0.357674	29	42	0	3	4.2	22.8887	0.223005	11	0	39
107	2018	2.30259	3.49651	0.357674	26	43	0	3	5.68	22.8975	0.209751	11	0	39
107	2019	1.79176	2.89037	0.357674	-0.96	44	0	3	6.85	22.6592	0.179687	11	0	39
107	2020	1.79176	3.7612	0.357674	16	45	0	3	7.82	22.7148	0.183506	11	0	39
108	2015	0	3.93183	0.135883	12	47	1	3	8.62	21.6391	0.3384	11	0	34
108	2016	0.693147	3.09104	0.135883	56	48	1	3	16.6	21.9261	0.297244	11	0	34
108	2017	1.09861	1.79176	0.135883	9.9	49	1	3	10.7	21.9716	0.347111	11	0	34
108	2018	0	4.09434	0.135883	6.7	50	1	3	7.49	22.0935	0.412289	11	0	34
108	2019	1.09861	3.46574	0.135883	15	51	1	3	7.74	22.1132	0.415418	11	0	34
108	2020	0	1.60944	0.135883	4.3	52	1	3	8.04	22.0989	0.455833	11	0	34
109	2015	1.38629	1.79176	0.294429	12	56	0	2	5.71	21.2799	0.136527	11	0	35
109	2016	2.63906	2.3979	0.294429	15	57	0	2	3.17	21.3323	0.146409	11	0	35
109	2017	1.38629	1.94591	0.294429	19	58	0	2	3.4	21.5278	0.245061	11	0	35
109	2018	1.38629	2.63906	0.294429	20	59	0	2	3.58	21.6602	0.282032	11	0	35
109	2019	1.38629	3.09104	0.294429	20	60	0	2	3.55	21.6568	0.216197	11	0	35
109	2020	1.79176	3.17805	0.294429	18	61	0	2	3.31	22.0937	0.236372	11	0	35
110	2015	0	0	0.35046	30	45	0	4	7.99	21.5852	0.273258	10	0	65
110	2016	0	0	0.35046	26	46	0	4	7.26	21.7037	0.302329	10	0	65
110	2017	0.693147	0	0.35046	25	47	0	4	6.04	21.7789	0.264539	10	0	65
110	2018	1.09861	0.693147	0.35046	24	48	0	4	5.86	21.9321	0.271043	10	0	65
110	2019	0	0.693147	0.35046	23	49	0	4	4.9	22.1447	0.334016	10	0	65
110	2020	1.09861	0	0.35046	32	50	0	4	4.55	22.2296	0.312285	10	0	65
111	2015	1.79176	0	0.159611	22	43	0	4	10.7	21.6745	0.360028	10	0	65
111	2016	0.693147	0	0.159611	24	44	0	4	10.4	22.0192	0.225774	10	0	65
111	2017	0.693147	0	0.159611	-1.3	45	0	4	12.5	22.2383	0.438653	10	0	65
111	2018	0	0	0.159611	-5.7	46	0	4	11.3	22.0608	0.333003	10	0	65
111	2019	0	0	0.159611	1.6	47	0	4	8.02	21.8708	0.286749	10	0	65
111	2020	0	0	0.159611	26	48	0	4	7.63	21.8682	0.28231	10	0	65
112	2015	0	0	0.190334	23	53	0	4	2.2	21.3573	0.44063	10	0	27
112	2016	0.693147	0	0.190334	28	54	0	4	3.16	21.7025	0.404985	10	0	27
112	2017	1.38629	0	0.190334	25	55	0	4	4.54	21.8084	0.446835	10	0	27
112	2018	0.693147	0	0.190334	27	56	0	4	4.14	21.9278	0.466506	10	0	27
112	2019	0	0.693147	0.190334	26	57	0	4	4.66	21.9305	0.459711	10	0	27
112	2020	0	0.693147	0.190334	18	58	0	4	4.38	21.9402	0.481786	10	0	27
113	2015	1.60944	1.79176	0.168873	25	49	1	4	4.84	21.4432	0.137526	10	0	35
113	2016	1.60944	1.94591	0.168873	22	50	1	4	6.61	21.5353	0.152067	10	0	35
113	2017	1.79176	2.19722	0.168873	22	51	1	4	5.07	21.6976	0.240849	10	0	35
113	2018	1.94591	2.77259	0.168873	24	52	1	4	4.78	21.9597	0.380562	10	0	35
113	2019	1.79176	2.63906	0.168873	27	53	1	4	5.02	22.1198	0.412746	10	0	35
113	2020	1.09861	2.99573	0.168873	28	54	1	4	3.92	22.2443	0.406677	10	0	35
114	2015	2.99573	5.45104	0.172107	31	43	0	4	2.95	22.2558	0.487302	8	0	38
114	2016	3.04452	6.03069	0.172107	32	44	0	4	3	22.4161	0.50967	8	0	38
114	2017	3.21888	5.94542	0.172107	27	45	0	4	3.28	22.6183	0.437725	8	0	38
114	2018	3.61092	5.36598	0.172107	28	46	0	4	3.26	22.6877	0.450662	8	0	38
114	2019	2.19722	6.2691	0.172107	28	47	0	4	3.66	22.8214	0.469019	8	0	38
114	2020	0	6.33859	0.172107	31	48	0	4	2.99	23.2486	0.511529	8	0	38
115	2015	0.693147	0	0.289928	23	47	1	6	5.51	21.1921	0.49671	8	0	27
115	2016	0	1.79176	0.289928	20	48	1	6	8.13	21.1953	0.446993	8	0	27
115	2017	1.09861	1.79176	0.289928	26	49	1	6	7.05	21.3803	0.459384	8	0	27
115	2018	0	0.693147	0.289928	30	50	1	6	6.02	21.4497	0.462563	8	0	27
115	2019	1.09861	1.94591	0.289928	30	51	1	6	8.12	21.5372	0.489085	8	0	27
115	2020	0.693147	1.38629	0.289928	27	52	1	6	6.57	21.5369	0.52111	8	0	27
116	2015	0	1.60944	0.142149	20	45	0	4	5.82	20.9915	0.343679	8	0	35
116	2016	1.09861	0.693147	0.142149	17	46	0	4	4.9	21.0842	0.371255	8	0	35
116	2017	0	1.09861	0.142149	18	47	0	4	4.35	21.175	0.39178	8	0	35
116	2018	0.693147	1.79176	0.142149	18	48	0	4	4.19	21.2713	0.41932	8	0	35
116	2019	0	2.48491	0.142149	21	49	0	4	3.97	21.1809	0.341819	8	0	35
116	2020	0.693147	3.04452	0.142149	19	50	0	4	4.46	20.977	0.220293	8	0	35
117	2015	1.60944	4.91998	0.150865	19	42	1	2	3.89	22.7616	0.668773	7	0	39
117	2016	1.94591	4.27667	0.150865	20	43	1	2	3.92	23.3568	0.613931	7	0	39
117	2017	2.56495	4.30407	0.150865	20	44	1	2	3.74	23.6622	0.686379	7	0	39
117	2018	1.38629	3.71357	0.150865	25	45	1	2	3.86	24.1903	0.699773	7	0	39
117	2019	1.09861	2.07944	0.150865	23	46	1	2	2.54	24.2729	0.701116	7	0	39
117	2020	1.38629	1.79176	0.150865	20	48	1	2	2.61	24.15	0.593114	7	0	38
118	2015	1.94591	4.43082	0.179842	19	47	0	4	3.21	20.5808	0.171641	7	0	35
118	2016	2.30259	3.66356	0.179842	20	48	0	4	3.66	20.6895	0.19958	7	0	35
118	2017	2.19722	1.79176	0.179842	23	49	0	4	4.07	20.8092	0.198055	7	0	35
118	2018	1.79176	2.99573	0.179842	25	49	0	4	3.95	21.3908	0.15126	7	0	35
118	2019	1.38629	2.70805	0.179842	25	51	0	4	4.06	21.5873	0.229562	7	0	35
118	2020	1.09861	3.95124	0.179842	27	52	0	4	4.46	21.7642	0.277708	7	0	35
119	2015	1.60944	3.21888	0.165809	21	53	1	6	3.15	20.3057	0.130904	7	0	38
119	2016	1.60944	4.62497	0.165809	17	54	1	6	3.54	21.98	0.0496506	7	0	38
119	2017	1.38629	3.68888	0.165809	16	55	1	6	4.66	22.0413	0.103873	7	0	38
119	2018	2.48491	3.66356	0.165809	13	56	1	6	3.67	22.1091	0.147275	7	0	38
119	2019	0	4.06044	0.165809	11	57	1	6	3.87	21.8992	0.168589	7	0	38
119	2020	0.693147	3.8712	0.165809	1.7	58	1	6	3.96	21.8831	0.163482	7	0	38
120	2015	0	0	0.497757	33	41	0	4	7.03	20.6659	0.496669	7	1	65
120	2016	0	1.60944	0.497757	30	42	0	4	8.78	20.8369	0.536716	7	1	65
120	2017	0	0	0.497757	31	43	1	4	9.21	20.9838	0.55466	7	1	65
120	2018	0	0	0.497757	33	44	1	4	13	21.3945	0.430467	7	1	65
120	2019	0	0	0.497757	30	45	1	4	12.1	21.4388	0.389337	7	1	65
120	2020	0.693147	0	0.497757	29	46	1	4	16.2	21.5219	0.383416	7	1	65
121	2015	0	1.94591	0.180674	22	52	1	2	3.72	20.4285	0.208799	7	0	35
121	2016	0	2.48491	0.180674	18	53	1	2	5.75	20.4541	0.195618	7	0	35
121	2017	0	2.3979	0.180674	15	54	1	2	6.19	20.5489	0.248791	7	0	35
121	2018	1.38629	2.89037	0.180674	11	55	1	2	7.49	20.5237	0.221082	7	0	35
121	2019	0	2.3979	0.180674	6	56	1	2	5.24	20.5644	0.245794	7	0	35
121	2020	1.09861	3.04452	0.180674	10	57	1	2	6.58	20.5972	0.299365	7	0	35
122	2015	1.60944	3.13549	0.219029	17	50	0	4	3.65	21.7417	0.647936	7	1	35
122	2016	0.693147	1.94591	0.219029	61	52	0	4	3.4	21.8613	0.658169	7	1	35
122	2017	0	2.63906	0.219029	13	53	0	4	3.95	22.072	0.698981	7	1	35
122	2018	1.38629	3.09104	0.219029	11	54	0	4	4.79	22.1295	0.707048	7	1	35
122	2019	1.38629	3.80666	0.219029	3.8	55	0	4	5.37	22.1625	0.777126	7	1	35
122	2020	0.693147	3.93183	0.219029	0.1	56	0	4	6.56	22.1771	0.784822	7	1	35
123	2015	2.56495	3.49651	0.417461	29	48	0	4	5.57	21.3524	0.431594	7	0	39
123	2016	2.07944	3.17805	0.417461	33	50	0	4	7.19	21.6854	0.292332	7	0	39
123	2017	1.60944	5.0814	0.417461	26	51	0	4	6.08	21.8176	0.338886	7	0	39
123	2018	2.63906	5.35186	0.417461	26	52	0	4	9.14	21.7725	0.296145	7	0	39
123	2019	3.29584	4.2485	0.417461	26	53	0	4	8.18	21.8681	0.354687	7	0	39
123	2020	2.83321	4.31749	0.417461	28	54	0	4	7.63	21.8749	0.338176	7	0	39
124	2015	0	0	0.251432	28	58	1	4	6.64	21.0607	0.0976396	13	0	27
124	2016	0.693147	0	0.251432	28	59	1	4	9.18	21.3989	0.274289	13	0	27
124	2017	1.09861	0	0.251432	27	60	1	4	11.9	21.536	0.219034	13	0	27
124	2018	0.693147	0	0.251432	28	61	1	5	11.5	21.6503	0.204142	13	0	27
124	2019	0.693147	1.09861	0.251432	29	62	1	5	14.7	21.8946	0.163097	13	0	27
124	2020	0	0.693147	0.251432	31	63	1	5	12.5	21.9774	0.164425	13	0	27
125	2015	3.85015	1.60944	0.325517	62	54	0	5	5	22.6051	0.195765	13	1	34
125	2016	3.71357	3.04452	0.325517	66	55	0	5	4.87	22.6806	0.204001	13	1	34
125	2017	3.29584	2.56495	0.325517	18	56	0	5	6.7	22.8543	0.28633	13	1	34
125	2018	3.04452	3.46574	0.325517	17	57	0	5	6.3	22.9763	0.337288	13	1	34
125	2019	3.78419	4.04305	0.325517	14	58	0	5	16.7	23.0196	0.338941	13	1	34
125	2020	4.00733	3.68888	0.325517	6.9	59	0	5	17.4	23.1007	0.547856	13	1	34
126	2015	0	0	0.159827	23	46	0	5	18.2	20.7596	0.320728	13	0	65
126	2016	0	0	0.159827	28	48	0	5	19.5	21.5091	0.256183	13	0	65
126	2017	1.38629	0	0.159827	25	48	0	5	16.8	21.6901	0.309673	13	0	65
126	2018	1.94591	0	0.159827	24	49	0	5	16.4	21.761	0.315165	13	0	65
126	2019	1.94591	0	0.159827	26	50	0	5	14.6	21.8423	0.30628	13	0	65
126	2020	1.38629	0	0.159827	27	51	0	5	15.7	22	0.401618	13	0	65
127	2015	0.693147	1.09861	0.17178	73	53	0	6	4.21	21.6098	0.173554	12	0	27
127	2016	1.09861	0.693147	0.17178	72	54	0	6	3.57	21.6507	0.129595	12	0	27
127	2017	0.693147	1.09861	0.17178	29	55	0	6	4.93	21.709	0.117273	12	0	27
127	2018	1.09861	1.09861	0.17178	27	56	0	6	3.17	21.7339	0.0954578	12	0	27
127	2019	1.79176	2.63906	0.17178	26	57	0	6	3.85	21.7679	0.0960449	12	0	27
127	2020	1.38629	0.693147	0.17178	23	58	0	6	6.51	21.7801	0.103903	12	0	27
128	2015	0	1.38629	0.147315	11	53	0	4	3.82	21.5731	0.298851	12	0	38
128	2016	0.693147	1.79176	0.147315	19	54	0	4	4.12	21.7644	0.370047	12	0	38
128	2017	0	1.09861	0.147315	17	55	0	4	3.37	22.0538	0.506835	12	0	38
128	2018	0	1.09861	0.147315	13	56	0	4	3.59	22.0394	0.484783	12	0	38
128	2019	0	1.09861	0.147315	7.5	57	0	4	5.44	22.3236	0.584717	12	0	38
128	2020	0	0	0.147315	14	58	0	4	3.46	22.6998	0.668256	12	0	38
129	2015	2.48491	2.63906	0.425614	20	36	0	3	3.08	20.5983	0.0496506	12	0	39
129	2016	2.3979	2.56495	0.425614	30	37	0	3	2.83	20.6448	0.0502324	12	0	39
129	2017	0.693147	2.48491	0.425614	28	38	0	3	2.83	20.6738	0.0496506	12	0	39
129	2018	0.693147	2.19722	0.425614	31	39	0	3	2.22	20.722	0.0496506	12	0	39
129	2019	1.38629	2.94444	0.425614	29	40	0	3	2.26	20.8054	0.074606	12	0	39
129	2020	1.38629	2.99573	0.425614	27	41	0	3	2.09	20.888	0.09805	12	0	39
130	2015	1.38629	0	0.0970313	18	39	0	4	23.9	20.87	0.214319	12	0	35
130	2016	1.94591	2.19722	0.0970313	17	40	0	4	28.7	20.9572	0.207977	12	0	35
130	2017	2.70805	0.693147	0.0970313	18	41	0	4	10.9	21.3489	0.270943	12	0	35
130	2018	2.3979	1.60944	0.0970313	24	42	0	4	17.2	21.5767	0.196932	12	0	35
130	2019	2.30259	1.38629	0.0970313	2.5	43	0	4	26.5	21.5606	0.260324	12	0	35
130	2020	2.07944	1.09861	0.0970313	27	44	0	4	24.4	21.5963	0.269646	12	0	39
131	2015	0.693147	0	0.306227	28	40	0	3	9.45	21.4367	0.191267	12	0	27
131	2016	0	0	0.306227	29	42	0	3	7.99	21.6015	0.241479	12	0	27
131	2017	0	0	0.306227	29	43	0	3	10.1	21.6406	0.228154	12	0	27
131	2018	0	0	0.306227	24	44	0	3	12.1	21.4814	0.291416	12	0	27
131	2019	0	0	0.306227	24	45	0	3	12.4	21.5343	0.310486	12	0	35
131	2020	0	0	0.306227	25	46	0	3	12.6	21.5521	0.294698	12	0	35
132	2015	3.93183	1.94591	0.22731	21	43	0	4	24.2	21.8863	0.120117	12	0	39
132	2016	4.69135	0.693147	0.22731	60	44	0	4	17.2	21.9154	0.100288	12	0	39
132	2017	4.11087	1.38629	0.22731	2.2	45	0	4	19.8	21.8152	0.145377	12	0	39
132	2018	3.66356	1.79176	0.22731	2.4	46	1	4	24	21.7703	0.629084	12	0	39
132	2019	2.99573	1.09861	0.22731	15	47	1	4	38.8	21.4233	0.459972	12	0	39
132	2020	2.77259	1.38629	0.22731	8.3	48	1	4	38.8	21.4389	0.467419	12	0	39
133	2015	2.19722	1.60944	0.363373	20	46	0	4	8.65	20.8875	0.227946	12	0	65
133	2016	1.09861	1.79176	0.363373	21	47	0	4	6.01	21.123	0.333555	12	0	65
133	2017	1.09861	0.693147	0.363373	24	48	0	4	4.7	21.5201	0.390658	12	0	65
133	2018	0.693147	1.09861	0.363373	26	49	0	4	4.68	21.4908	0.366043	12	0	65
133	2019	0	2.07944	0.363373	-6.8	50	0	4	6.89	21.4628	0.343898	12	0	65
133	2020	1.38629	3.04452	0.363373	-2.3	51	0	4	5.91	21.4681	0.3394	12	0	65
134	2015	0.693147	2.3979	0.170026	17	37	0	3	5.07	20.9004	0.277887	12	0	35
134	2016	0	2.19722	0.170026	14	38	0	3	5.69	21.4748	0.382908	12	0	35
134	2017	0.693147	1.38629	0.170026	14	39	0	3	4.61	21.6932	0.474965	12	0	35
134	2018	1.79176	1.94591	0.170026	-0.81	40	0	3	4.3	21.6047	0.467	12	0	35
134	2019	0.693147	0	0.170026	14	41	0	3	3.79	21.6585	0.460192	12	0	35
134	2020	0	1.60944	0.170026	19	42	0	6	5.36	21.7921	0.471301	12	0	35
135	2015	0.693147	2.77259	0.318626	30	57	0	4	13.1	21.0279	0.347311	12	0	39
135	2016	1.09861	1.79176	0.318626	23	58	0	4	16.3	20.8601	0.204444	12	0	39
135	2017	2.99573	1.09861	0.318626	23	59	0	4	14.9	20.9679	0.254125	12	0	39
135	2018	2.30259	1.38629	0.318626	27	60	0	4	22	21.1588	0.287614	12	0	39
135	2019	2.19722	0	0.318626	26	61	0	4	16.5	21.2229	0.328631	12	0	39
135	2020	1.94591	0	0.318626	24	62	0	4	17.4	21.3895	0.385274	12	0	39
136	2015	0	2.83321	0.264223	7.5	42	0	3	8.88	21.9354	0.27038	12	0	39
136	2016	1.38629	3.17805	0.264223	13	43	0	3	4.27	21.9164	0.241706	12	0	39
136	2017	3.66356	0	0.264223	20	44	0	3	6.43	22.3887	0.487162	12	0	39
136	2018	3.55535	0	0.264223	18	45	0	3	8.29	22.5766	0.547458	12	0	39
136	2019	3.46574	2.99573	0.264223	5.3	46	0	3	10.7	22.6546	0.622899	12	0	39
136	2020	3.04452	1.60944	0.264223	4.9	47	0	3	6.91	22.55	0.621262	12	0	39
137	2015	1.09861	2.19722	0.249154	21	51	0	4	6.35	21.3167	0.252276	12	1	39
137	2016	2.30259	1.79176	0.249154	20	52	0	4	5.73	21.3831	0.253699	12	1	39
137	2017	1.94591	1.79176	0.249154	19	53	0	4	5.88	21.5169	0.291225	12	1	39
137	2018	2.07944	2.07944	0.249154	19	54	0	4	5.28	21.4475	0.267877	12	1	39
137	2019	1.38629	2.89037	0.249154	20	55	0	4	4.79	21.6348	0.330304	12	1	39
137	2020	1.94591	2.70805	0.249154	20	56	0	4	5.7	21.7993	0.326786	12	1	39
138	2015	1.38629	0	0.393008	25	52	1	5	9.2	21.5771	0.246856	12	0	27
138	2016	1.38629	0	0.393008	25	53	1	5	10.9	21.7287	0.229675	12	0	27
138	2017	1.94591	0.693147	0.393008	24	54	1	5	10.4	21.7963	0.255779	12	0	27
138	2018	1.38629	0	0.393008	23	55	1	5	8.26	21.8214	0.24814	12	0	27
138	2019	1.94591	0	0.393008	27	56	1	5	7.8	21.9939	0.338496	12	0	27
138	2020	0.693147	0	0.393008	30	57	1	5	7.73	22.084	0.298061	12	0	27
139	2015	0	0	0.130727	26	62	1	2	10.4	21.7097	0.0792063	12	0	27
139	2016	0	0	0.130727	18	63	1	2	17	21.72	0.0694651	12	0	27
139	2017	0	0	0.130727	26	64	1	2	6.97	22.1357	0.284558	12	0	27
139	2018	0.693147	0	0.130727	30	65	1	2	3.24	22.6417	0.386081	12	0	27
139	2019	1.38629	0	0.130727	32	66	1	2	2.45	23.1159	0.474766	12	0	27
139	2020	1.09861	0	0.130727	32	67	1	2	3.16	23.4456	0.457868	12	0	27
140	2015	2.63906	2.63906	0.169029	16	49	1	3	13.4	21.3235	0.305238	12	0	35
140	2016	2.56495	0	0.169029	16	50	1	3	13.2	21.7517	0.472131	12	0	35
140	2017	1.38629	2.48491	0.169029	19	51	1	3	12.5	22.0828	0.481227	12	0	35
140	2018	0.693147	2.3979	0.169029	16	52	1	3	8.7	22.1489	0.490241	12	0	35
140	2019	0.693147	0	0.169029	21	53	1	3	7.39	21.939	0.272645	12	0	35
140	2020	0.693147	0	0.169029	22	54	1	3	8.24	21.94	0.281302	12	0	35
141	2015	1.09861	1.38629	0.137564	19	53	1	2	4.06	20.5749	0.184592	12	0	38
141	2016	1.60944	0	0.137564	18	54	1	2	6	20.6846	0.248776	12	0	38
141	2017	1.09861	2.3979	0.137564	15	55	1	2	4.05	20.9047	0.4089	12	0	38
141	2018	1.79176	1.94591	0.137564	12	56	1	2	4.5	21.1825	0.539033	12	0	38
141	2019	0.693147	2.56495	0.137564	14	57	1	2	3.89	21.0161	0.443858	12	0	38
141	2020	0	1.79176	0.137564	4.4	58	1	2	5.4	20.7278	0.324115	12	0	38
142	2015	0	0	0.28073	23	54	1	4	6.38	22.2606	0.237752	12	0	27
142	2016	2.30259	1.09861	0.28073	15	55	1	4	5.64	22.8013	0.538806	12	0	27
142	2017	1.60944	1.94591	0.28073	16	56	1	4	4.71	22.9683	0.588618	12	0	27
142	2018	0.693147	2.3979	0.28073		57	1	4	4.51	22.878	0.534842	12	0	27
142	2019	1.38629	2.56495	0.28073	8.3	58	1	4	4.71	22.8588	0.514085	12	0	27
142	2020	1.94591	2.07944	0.28073	17	59	1	4	4.67	23.0034	0.565048	12	0	27
143	2015	1.09861	0.693147	0.18458	25	53	1	4	5.12	21.2559	0.100887	12	0	34
143	2016	1.38629	1.94591	0.18458	23	54	1	4	5.15	21.3018	0.126791	12	0	34
143	2017	1.94591	1.79176	0.18458	24	55	1	4	4.81	21.3475	0.162803	12	0	34
143	2018	1.60944	2.3979	0.18458	25	56	1	4	5.16	21.369	0.156527	12	0	34
143	2019	1.60944	2.89037	0.18458	25	57	1	4	5.82	21.3754	0.134969	12	0	34
143	2020	1.09861	2.3979	0.18458	24	58	1	4	4.29	21.3849	0.164081	12	0	34
144	2015	1.60944	3.66356	0.236096	14	47	1	4	6.8	20.9362	0.120751	11	0	39
144	2016	1.94591	2.70805	0.236096	18	48	1	4	6.06	21.1285	0.238085	11	0	39
144	2017	1.09861	2.56495	0.236096	19	49	1	4	5.37	21.0277	0.175604	11	0	39
144	2018	1.38629	2.83321	0.236096	5	50	1	4	5.41	21.0344	0.226024	11	0	39
144	2019	1.38629	2.99573	0.236096	12	51	1	4	4.59	21.0564	0.324715	11	0	39
144	2020	0	2.99573	0.236096	-0.73	52	1	4	7.16	20.8714	0.459303	11	0	39
145	2015	0	0	0.0582011	24	50	1	3	13.9	21.7635	0.342862	11	0	65
145	2016	0	0	0.0582011	25	51	1	3	12.2	22.3206	0.182421	11	0	65
145	2017	1.38629	0	0.0582011	26	52	1	3	21.7	22.3616	0.12733	11	0	65
145	2018	0	0	0.0582011	27	53	1	3	22.3	22.5326	0.164344	11	0	65
145	2019	0	2.07944	0.0582011	26	54	1	3	27.3	22.6257	0.152795	11	0	65
145	2020	1.38629	1.60944	0.0582011	22	55	1	3	29.2	22.7223	0.195873	11	0	65
146	2015	3.13549	0.693147	0.145856	26	47	0	3	14.6	21.5128	0.232075	11	1	65
146	2016	3.68888	1.60944	0.145856	26	48	0	3	15.8	21.689	0.279485	11	1	65
146	2017	3.13549	1.38629	0.145856	31	49	0	3	15.2	21.8585	0.244715	11	1	65
146	2018	3.09104	0.693147	0.145856	28	50	0	3	16.4	21.9599	0.2529	11	1	65
146	2019	3.09104	1.09861	0.145856	25	50	0	3	17.3	22.1584	0.289441	11	1	65
146	2020	3.68888	1.38629	0.145856	26	51	0	3	17.4	22.2591	0.279252	11	1	65
147	2015	1.38629	0.693147	0.226588	20	44	0	4	6.23	21.5514	0.129507	11	0	34
147	2016	1.09861	1.79176	0.226588	21	45	0	4	6.41	21.6329	0.143519	11	0	34
147	2017	0	2.99573	0.226588	21	46	1	4	5.24	21.6925	0.133479	11	0	34
147	2018	0.693147	2.56495	0.226588	28	47	1	4	6.07	21.7405	0.121462	11	0	34
147	2019	0.693147	3.91202	0.226588	29	48	1	4	6.11	21.7407	0.145813	11	0	34
147	2020	0.693147	3.91202	0.226588	29	49	1	4	5.79	21.7153	0.16254	11	0	34
148	2015	1.09861	2.63906	0.242027	12	51	0	3	5.38	20.9998	0.402638	11	0	35
148	2016	2.07944	2.07944	0.242027	16	52	0	3	5.3	21.6693	0.471085	11	0	35
148	2017	2.19722	2.83321	0.242027	17	53	0	3	4.96	21.7213	0.424577	11	0	35
148	2018	2.70805	3.21888	0.242027	18	54	0	3	5.19	21.9202	0.513307	11	0	35
148	2019	1.94591	2.70805	0.242027	15	55	0	3	4.49	21.9661	0.527372	11	0	35
148	2020	0.693147	1.09861	0.242027	-2.7	56	0	3	4.43	21.7762	0.600381	11	0	35
149	2015	1.79176	1.79176	0.408778	31	47	0	3	4.5	21.4512	0.186908	11	0	27
149	2016	1.09861	0.693147	0.408778	30	48	0	3	5.37	21.5779	0.18392	11	0	27
149	2017	1.38629	0	0.408778	30	49	0	3	6.64	21.6897	0.159459	11	0	27
149	2018	0.693147	0	0.408778	28	50	0	3	16.1	21.7429	0.113378	11	0	27
149	2019	1.94591	1.79176	0.408778	0.82	51	0	3	25.1	21.3451	0.121983	11	0	27
149	2020	1.60944	0.693147	0.408778	10	52	0	3	38.8	21.3418	0.144757	11	0	27
150	2015	3.55535	3.7612	0.388159	21	52	1	4	26.5	21.0966	0.162758	11	0	35
150	2016	3.71357	3.58352	0.388159	12	53	1	4	22.6	21.1068	0.164701	11	0	35
150	2017	3.68888	3.3322	0.388159	15	54	1	4	21	21.0789	0.122899	11	0	35
150	2018	3.3673	3.8712	0.388159	17	55	1	4	17.9	21.089	0.127501	11	0	35
150	2019	3.17805	4.29046	0.388159		56	1	4	17.1	21.1267	0.132525	11	0	35
150	2020	2.83321	4.7185	0.388159	32	57	1	4	9.4	21.5382	0.197355	11	0	35
151	2015	1.09861	0	0.364692	25	47	0	4	8.13	22.2612	0.437518	11	1	65
151	2016	3.73767	0	0.364692	22	48	0	4	7.91	22.5903	0.562539	11	1	65
151	2017	2.89037	1.09861	0.364692	22	49	0	4	7.44	22.9257	0.640926	11	1	65
151	2018	0.693147	1.79176	0.364692	27	50	0	4	7.47	23.1312	0.6557	11	1	65
151	2019	1.09861	0	0.364692	30	51	1	4	5.79	23.281	0.697864	11	1	65
151	2020	1.94591	1.09861	0.364692	26	52	1	4	9.58	23.4563	0.696564	11	1	65
152	2015	0.693147	2.19722	0.39444	19	43	0	6	3.7	21.5634	0.198743	11	0	38
152	2016	0.693147	1.94591	0.39444	18	43	0	6	3.72	21.7302	0.258778	11	0	38
152	2017	0	1.60944	0.39444	14	44	0	6	3.75	21.8126	0.302913	11	0	38
152	2018	0	1.79176	0.39444	15	45	0	6	3.47	22.032	0.399491	11	0	38
152	2019	0	1.94591	0.39444	5.1	46	0	6	3.66	21.9961	0.414304	11	0	38
152	2020	0	1.79176	0.39444	14	47	0	6	3.53	22.0548	0.457412	11	0	38
153	2015	1.79176	1.60944	0.0863738	14	46	1	5	38.8	20.8422	0.0496506	11	0	39
153	2016	1.60944	2.19722	0.0863738	15	47	1	5	38.8	20.8497	0.0496506	11	0	39
153	2017	2.30259	1.09861	0.0863738	12	48	1	5	30.8	20.8689	0.0496506	11	0	39
153	2018	1.09861	0.693147	0.0863738	13	49	1	5	28.5	20.9039	0.0496506	11	0	39
153	2019	1.94591	0	0.0863738	15	50	1	5	18.3	20.9929	0.0565915	11	0	39
153	2020	2.3979	1.09861	0.0863738	17	51	1	5	16.4	22.917	0.0832655	11	0	39
154	2015	0	0	0.220606	25	50	0	4	24	21.3147	0.152195	11	0	65
154	2016	1.09861	0	0.220606	22	51	0	4	20.3	21.4467	0.182118	11	0	65
154	2017	1.38629	0	0.220606	23	52	0	4	17.6	21.5164	0.158103	11	0	65
154	2018	1.09861	0	0.220606	27	53	0	4	19.4	21.6997	0.283492	11	0	65
154	2019	1.60944	0	0.220606	22	54	0	4	18.3	21.7843	0.266144	11	0	65
154	2020	1.09861	0	0.220606	24	55	0	4	13.8	21.7625	0.22885	11	0	65
155	2015	0	0.693147	0.262152	31	54	1	4	3.67	20.3057	0.252912	11	0	65
155	2016	0	0.693147	0.262152	32	55	1	4	3.07	20.7275	0.385736	11	0	65
155	2017	0.693147	0.693147	0.262152	32	56	1	4	3.95	21.043	0.468883	11	0	65
155	2018	1.09861	1.60944	0.262152	33	57	1	4	3.71	21.3368	0.249475	11	0	65
155	2019	0.693147	0.693147	0.262152	30	58	1	4	3.86	21.6455	0.506739	11	0	65
155	2020	0.693147	0	0.262152	35	59	1	4	3.14	21.8264	0.533446	11	0	65
156	2015	1.79176	3.4012	0.292783	20	42	1	1	3.98	21.2561	0.390072	11	0	39
156	2016	1.79176	2.77259	0.292783	20	43	1	1	4.33	21.681	0.415422	11	0	39
156	2017	1.60944	4.11087	0.292783	19	44	1	1	3.6	22.3108	0.58163	11	0	39
156	2018	1.38629	4.8752	0.292783	21	45	1	6	4.57	22.5823	0.591352	11	0	39
156	2019	1.09861	4.92725	0.292783	21	46	1	6	4.19	22.7404	0.588403	11	0	39
156	2020	2.94444	5.20949	0.292783	16	47	1	6	4.64	22.8229	0.567496	11	0	39
157	2015	2.56495	0	0.255373	24	53	0	6	4.57	21.4146	0.34361	11	0	27
157	2016	2.3979	0	0.255373	22	54	0	6	4.18	21.5373	0.333504	11	0	27
157	2017	1.60944	0	0.255373	23	55	0	6	5.35	22.3133	0.197034	11	0	27
157	2018	1.94591	0	0.255373	28	56	0	6	10	22.3884	0.226715	11	0	27
157	2019	1.09861	0	0.255373	24	57	0	6	13.8	22.4447	0.269572	11	0	27
157	2020	0	0	0.255373	4	58	0	6	8.92	22.3327	0.306556	11	0	27
158	2015	1.79176	1.38629	0.161181	13	46	1	3	4.38	20.8926	0.444365	11	0	39
158	2016	2.19722	1.79176	0.161181	14	47	1	3	4.2	21.3622	0.458569	11	0	39
158	2017	2.07944	2.07944	0.161181	18	48	1	3	3.66	21.5984	0.48915	11	0	39
158	2018	1.09861	3.17805	0.161181	15	49	1	3	5.84	21.6039	0.445334	11	0	39
158	2019	1.09861	3.17805	0.161181	4.8	50	1	3	5.99	21.4782	0.437505	11	0	39
158	2020	0	2.30259	0.161181	7.7	51	1	3	7.44	21.528	0.44055	11	0	39
159	2015	0.693147	1.60944	0.399446	18	52	1	4	6.77	20.3057	0.206283	11	0	35
159	2016	1.38629	2.07944	0.399446	23	53	1	4	5.71	20.3472	0.265513	11	0	35
159	2017	1.09861	2.19722	0.399446	22	54	1	4	5.27	20.5004	0.307596	11	0	35
159	2018	1.79176	2.48491	0.399446	23	55	1	4	5.73	20.6379	0.322352	11	0	35
159	2019	1.60944	2.30259	0.399446	26	56	1	4	6.28	20.684	0.390672	11	0	35
159	2020	0.693147	2.70805	0.399446	31	57	1	4	4.49	21.1977	0.357357	11	0	35
160	2015	0	1.38629	0.278853	22	52	1	6	9.12	21.0199	0.38734	11	0	65
160	2016	0	0.693147	0.278853	22	53	1	6	11.6	21.319	0.329077	11	0	65
160	2017	1.09861	2.19722	0.278853	22	53	1	6	13.6	21.4353	0.322663	11	0	65
160	2018	1.38629	2.83321	0.278853	23	54	1	6	15.3	21.4696	0.306353	11	0	65
160	2019	1.79176	3.4012	0.278853	25	55	1	6	16.9	21.559	0.240399	11	0	65
160	2020	1.09861	2.70805	0.278853	26	56	1	6	20	21.5541	0.187073	11	0	65
161	2015	1.09861	1.94591	0.181476	26	44	1	4	9.18	20.6724	0.142781	11	0	39
161	2016	0	1.79176	0.181476	28	45	1	4	15.7	21.3221	0.0981371	11	0	39
161	2017	0	0	0.181476	27	46	1	4	19	21.3388	0.0893643	11	0	39
161	2018	0.693147	2.19722	0.181476	-7	47	1	4	21	21.1612	0.144422	11	0	65
161	2019	0.693147	0	0.181476	15	48	1	4	19.4	20.905	0.139878	11	0	65
161	2020	1.38629	1.38629	0.181476	-2	49	1	4	26.8	20.683	0.266226	11	0	65
162	2015	0	0	0.171188	18	47	0	4	11.9	21.2742	0.396103	11	0	65
162	2016	0	0	0.171188	28	48	0	4	13.6	21.9312	0.280864	11	0	65
162	2017	0	0	0.171188	23	49	0	4	20.1	22.0349	0.283737	11	0	65
162	2018	0	0	0.171188	19	50	0	4	20.2	22.1672	0.227216	11	0	65
162	2019	0.693147	0	0.171188	22	51	0	4	20.2	22.3562	0.236537	11	0	65
162	2020	1.38629	0	0.171188	25	52	0	4	20.8	22.5245	0.221706	11	0	65
163	2015	0	0	0.363464	16	57	0	5	3.01	22.1643	0.205003	11	0	34
163	2016	0	0.693147	0.363464	19	58	0	5	3.54	22.3386	0.306407	11	0	34
163	2017	0	0	0.363464	17	59	0	5	3.71	22.5122	0.434875	11	0	34
163	2018	0	0	0.363464	18	60	0	5	3.54	22.7494	0.537148	11	0	34
163	2019	0	0	0.363464	14	61	0	5	3.3	22.8216	0.559671	11	0	34
163	2020	0	0	0.363464	15	62	0	5	3.52	23.1177	0.567645	11	0	34
164	2015	0	0	0.0843773	3	60	1	2	4.25	20.738	0.350985	11	0	34
164	2016	0	0.693147	0.0843773	14	61	1	2	3.65	20.7321	0.34152	11	0	34
164	2017	0	2.83321	0.0843773	15	62	1	2	3.61	20.8649	0.404454	11	0	34
164	2018	0	0.693147	0.0843773	14	63	1	2	3.6	21.3812	0.621686	11	0	34
164	2019	0	2.30259	0.0843773	16	64	1	2	4.45	21.587	0.64887	11	0	34
164	2020	0	3.46574	0.0843773	15	65	1	2	4.9	21.5691	0.52055	11	0	34
165	2015	1.09861	2.89037	0.385509	18	53	0	4	2.62	22.01	0.32678	11	0	34
165	2016	1.38629	3.13549	0.385509	13	54	0	4	4.24	21.9227	0.257089	11	0	34
165	2017	1.09861	2.99573	0.385509	14	55	0	5	4.07	22.0193	0.291168	11	0	34
165	2018	1.09861	2.70805	0.385509	17	56	0	5	3.73	22.2144	0.364745	11	0	34
165	2019	0	2.56495	0.385509	17	57	0	5	4.94	22.2673	0.356425	11	0	34
165	2020	1.09861	2.70805	0.385509	18	58	0	5	5.8	22.3842	0.458444	11	0	34
166	2015	0.693147	2.07944	0.195029	14	48	1	4	14.4	20.4692	0.255116	11	0	39
166	2016	1.09861	2.30259	0.195029	14	49	1	4	12.5	20.6188	0.305732	11	0	39
166	2017	1.79176	2.70805	0.195029	16	50	1	4	9.56	20.8272	0.389478	11	0	39
166	2018	2.83321	1.60944	0.195029	13	51	1	4	14.3	21.1213	0.30808	11	0	39
166	2019	1.09861	1.09861	0.195029	3.2	52	1	4	15.6	21.0024	0.300297	11	0	39
166	2020	0.693147	0.693147	0.195029	8.7	53	1	4	12.2	20.8009	0.266343	11	0	39
167	2015	1.60944	2.70805	0.258377	24	48	1	3	5.43	22.0396	0.354848	11	0	35
167	2016	0	0.693147	0.258377	23	49	1	3	6.58	22.2428	0.458804	11	0	35
167	2017	0.693147	0.693147	0.258377	23	50	1	3	6.51	22.4403	0.543003	11	0	35
167	2018	0	0	0.258377	23	51	1	3	6.34	22.4946	0.550457	11	0	35
167	2019	0.693147	1.60944	0.258377	20	51	1	3	4.95	22.5952	0.580511	11	0	35
167	2020	0.693147	1.38629	0.258377	21	52	1	3	5.3	22.6161	0.579273	11	0	35
168	2015	3.29584	4.61512	0.232416	18	47	1	4	3.21	22.6377	0.581935	11	0	38
168	2016	3.80666	4.5326	0.232416	25	48	1	4	4.37	23.1792	0.488396	11	0	38
168	2017	4.57471	4.41884	0.232416	23	50	1	4	3.96	23.5112	0.567755	11	0	38
168	2018	4.31749	4.92725	0.232416	21	51	1	5	4.65	23.6406	0.578491	11	0	38
168	2019	4.41884	4.60517	0.232416	21	52	1	4	4.89	23.8509	0.616339	11	0	38
168	2020	4.76217	4.77068	0.232416	23	53	1	4	4.18	24.0556	0.612016	11	0	38
169	2015	1.09861	3.46574	0.343946	16	33	0	3	3.88	20.7654	0.29374	11	1	35
169	2016	1.09861	2.89037	0.343946	15	33	0	3	5.43	20.862	0.338537	11	1	35
169	2017	1.60944	2.63906	0.343946	14	33	0	3	5.18	21.1534	0.22168	11	1	35
169	2018	1.79176	2.63906	0.343946	13	33	0	3	7.52	21.1036	0.172417	11	1	35
169	2019	1.09861	2.48491	0.343946	16	34	0	3	7.24	21.1302	0.182032	11	1	35
169	2020	2.07944	2.56495	0.343946	15	35	0	3	6.02	21.0806	0.119666	11	1	35
170	2015	0	0	0.0906725	16	47	1	1	4.12	20.5425	0.330812	10	0	38
170	2016	1.79176	0.693147	0.0906725	16	48	1	1	3.38	20.9238	0.530022	10	0	38
170	2017	1.09861	0	0.0906725	14	49	1	1	2.75	21.0936	0.604133	10	0	38
170	2018	1.09861	2.07944	0.0906725	11	50	1	1	3.24	21.0631	0.580571	10	0	38
170	2019	2.3979	0	0.0906725	11	51	1	1	2.54	21.0956	0.575006	10	0	38
170	2020	2.94444	0.693147	0.0906725	11	52	1	1	3.05	21.2756	0.559281	10	0	38
171	2015	0.693147	1.09861	0.0849373	23	52	1	4	4.27	22.4458	0.466069	10	0	65
171	2016	0	1.60944	0.0849373	51	53	1	4	6.52	22.6316	0.183413	10	0	65
171	2017	0.693147	0	0.0849373	24	54	1	4	6.12	22.7063	0.194612	10	0	65
171	2018	0	0	0.0849373	-8.8	55	1	4	10.8	22.4673	0.338506	10	0	65
171	2019	0	0	0.0849373	7.9	56	1	4	6.96	22.3316	0.234567	10	0	65
171	2020	0	0	0.0849373	-1	57	1	4	11.5	21.9964	0.327219	10	0	65
172	2015	2.07944	2.99573	0.145549	77	51	1	5	4.12	22.3875	0.544421	10	0	39
172	2016	2.83321	3.63759	0.145549	76	52	1	5	4.4	22.8293	0.45607	10	0	39
172	2017	1.94591	3.4012	0.145549	22	53	1	5	4.06	23.2615	0.554871	10	0	39
172	2018	2.63906	3.17805	0.145549	17	54	1	5	4.11	23.4039	0.467457	10	0	39
172	2019	2.63906	3.3322	0.145549	22	55	1	5	4.09	23.4562	0.45326	10	0	39
172	2020	0.693147	3.73767	0.145549	2.9	56	1	5	4.79	23.3361	0.467898	10	0	39
173	2015	1.79176	0	0.141803	25	46	0	3	9.14	21.5372	0.441247	10	0	65
173	2016	0.693147	0	0.141803	24	47	0	3	9.07	22.5641	0.428096	10	0	65
173	2017	1.79176	0	0.141803	25	48	0	3	11.1	22.8382	0.506672	10	0	65
173	2018	0.693147	0	0.141803	25	50	0	3	10.9	23.0147	0.537483	10	0	65
173	2019	0	0	0.141803	2.6	51	0	3	12.3	22.8797	0.536502	10	0	65
173	2020	0	0	0.141803	0.4	52	0	3	21.6	22.7184	0.606337	10	0	65
174	2015	1.09861	3.73767	0.325711	27	50	1	4	6.04	21.0115	0.0703834	10	0	35
174	2016	0	3.09104	0.325711	26	51	1	4	6.53	21.1109	0.132799	10	0	35
174	2017	2.07944	3.2581	0.325711	29	52	1	4	7.16	21.2318	0.164293	10	0	35
174	2018	2.3979	3.46574	0.325711	29	53	1	4	10.4	21.8219	0.12567	10	0	35
174	2019	1.94591	3.52636	0.325711	27	54	1	4	10.7	21.9116	0.192767	10	0	35
174	2020	2.19722	3.71357	0.325711	25	55	1	4	9.06	22.0832	0.296428	10	0	35
175	2015	2.89037	3.49651	0.0741949	19	47	1	6	7.05	22.1336	0.0559864	10	0	35
175	2016	2.48491	1.94591	0.0741949	20	48	1	6	7.06	22.2929	0.180105	10	0	35
175	2017	1.60944	2.19722	0.0741949	24	49	1	6	4.49	22.3769	0.220652	10	0	35
175	2018	2.19722	2.48491	0.0741949	17	50	1	6	3.84	22.4261	0.259395	10	0	35
175	2019	1.38629	2.99573	0.0741949	-0.34	51	1	6	5.07	22.0999	0.188455	10	0	35
175	2020	1.60944	3.46574	0.0741949	-0.46	52	1	6	5.41	21.9938	0.283829	10	0	35
176	2015	0	2.89037	0.24932	24	48	1	3	5.25	20.4393	0.0728941	10	0	35
176	2016	1.09861	1.38629	0.24932	25	49	1	3	5.54	20.5478	0.107844	10	0	35
176	2017	2.19722	1.79176	0.24932	25	49	1	3	5.93	20.5809	0.102639	10	0	35
176	2018	0	2.19722	0.24932	27	50	1	3	9.41	20.6021	0.105136	10	0	35
176	2019	1.38629	2.56495	0.24932	22	51	1	3	11.3	20.6878	0.141202	10	0	35
176	2020	1.38629	3.97029	0.24932	25	52	1	3	8.75	20.8385	0.150263	10	0	35
177	2015	1.94591	1.09861	0.367849	15	43	0	3	11.5	20.3675	0.284378	10	0	39
177	2016	2.3979	2.07944	0.367849	17	44	0	3	11.4	21.3238	0.266981	10	0	39
177	2017	2.89037	2.30259	0.367849	18	45	0	3	7.52	21.3344	0.239195	10	0	39
177	2018	2.19722	3.63759	0.367849	18	46	0	3	7.06	21.4564	0.30812	10	0	39
177	2019	2.30259	3.78419	0.367849	17	47	0	3	6.35	21.6162	0.375757	10	0	39
177	2020	1.94591	4.55388	0.367849	14	48	0	3	6.7	21.8494	0.490879	10	0	39
178	2015	0.693147	1.38629	0.39198	34	53	1	4	25.1	20.6079	0.0496506	10	0	65
178	2016	1.38629	0.693147	0.39198	32	54	1	4	32.6	20.6147	0.0496506	10	0	65
178	2017	0	0	0.39198	31	55	1	4	24.6	20.6092	0.0496506	10	0	65
178	2018	1.09861	0	0.39198	35	56	1	4	28.1	20.6081	0.0662152	10	0	65
178	2019	1.38629	0.693147	0.39198	32	57	1	4	29.5	20.6041	0.0496506	10	0	65
178	2020	1.38629	0	0.39198	27	58	1	4	35.6	20.5858	0.0730291	10	0	65
179	2015	1.60944	0.693147	0.166818	12	44	0	4	11.4	21.4739	0.380686	10	1	35
179	2016	1.09861	1.09861	0.166818	12	45	0	4	10.1	21.5584	0.410943	10	1	35
179	2017	0.693147	0.693147	0.166818	7.1	46	0	4	11	21.7944	0.433862	10	1	35
179	2018	1.38629	1.79176	0.166818	9.5	47	0	4	9.15	21.81	0.407083	10	1	35
179	2019	1.94591	1.79176	0.166818	-1.8	48	0	4	12.6	21.4266	0.550232	10	1	35
179	2020	0.693147	4.00733	0.166818	1.1	49	0	4	8.02	21.3345	0.554052	10	1	35
180	2015	0	1.79176	0.12952	71	47	1	4	5.99	20.9497	0.205168	10	0	40
180	2016	1.09861	1.60944	0.12952	61	48	1	4	7.08	21.9264	0.165735	10	0	40
180	2017	1.38629	3.61092	0.12952	30	49	1	4	5.91	22.1167	0.245946	10	0	40
180	2018	1.38629	4.77912	0.12952	35	50	1	4	5.73	22.2415	0.229689	10	0	65
180	2019	2.48491	4.35671	0.12952	32	51	1	4	8.2	22.3189	0.24686	10	0	65
180	2020	2.30259	4.18965	0.12952	35	52	1	4	9.62	22.381	0.316418	10	0	65
181	2015	0.693147	2.56495	0.105834	22	39	0	4	6.29	20.9713	0.142306	10	0	39
181	2016	1.79176	1.38629	0.105834	20	40	0	4	5.69	21.8567	0.131746	10	0	39
181	2017	0	1.79176	0.105834	20	41	0	4	4.91	21.9361	0.138212	10	0	39
181	2018	1.09861	1.60944	0.105834	-1.1	42	0	4	6.05	21.7843	0.17098	10	0	39
181	2019	1.38629	3.17805	0.105834	-2.8	43	0	4	10.1	21.6031	0.202003	10	0	39
181	2020	1.94591	2.48491	0.105834	13	44	0	4	8.37	21.6441	0.191694	10	0	39
182	2015	0.693147	0.693147	0.129688	20	50	1	3	12.5	20.6942	0.137646	10	0	65
182	2016	1.09861	1.38629	0.129688	18	51	1	3	15.7	21.5624	0.0715869	10	0	65
182	2017	1.79176	1.09861	0.129688	18	52	1	3	19.6	21.6373	0.111392	10	0	65
182	2018	3.3322	0.693147	0.129688	17	53	1	3	21	21.6713	0.121159	10	0	65
182	2019	3.68888	0	0.129688	-5.2	54	1	3	16.2	21.7529	0.196111	10	0	65
182	2020	3.46574	0.693147	0.129688	-5.1	55	1	3	23.9	21.7768	0.238744	10	0	65
183	2015	0	0	0.390274	31	49	0	4	11.7	21.162	0.269403	8	0	65
183	2016	1.60944	0	0.390274	32	50	0	4	12.2	21.3011	0.339555	8	0	65
183	2017	1.79176	0	0.390274	34	51	0	4	11.9	21.4057	0.374951	8	0	65
183	2018	1.38629	0	0.390274	33	52	0	4	12.2	21.611	0.450353	8	0	65
183	2019	0	0	0.390274	34	54	0	4	11.4	21.543	0.378394	8	0	65
183	2020	0	0	0.390274	34	55	1	4	12.6	21.5687	0.342385	8	0	65
184	2015	1.09861	0	0.118816	19	54	1	1	5.34	21.6203	0.422738	8	0	14
184	2016	0	0	0.118816	20	55	1	1	6.52	21.8895	0.359892	8	0	14
184	2017	0	0	0.118816	18	56	1	1	6.27	22.0701	0.456419	8	0	14
184	2018	0.693147	0	0.118816	20	57	1	1	5.13	22.2921	0.498722	8	0	14
184	2019	2.63906	0	0.118816	18	58	1	1	5.45	22.2314	0.396036	8	0	27
184	2020	1.60944	0	0.118816	20	59	1	1	6.41	22.2649	0.301634	8	0	27
185	2015	0	0	0.0582011	27	54	0	4	3.32	21.1779	0.268595	8	0	64
185	2016	0	0	0.0582011	26	55	0	4	4.82	22.9113	0.277418	8	0	65
185	2017	0	0	0.0582011	22	56	0	4	2.75	23.0854	0.356729	8	0	65
185	2018	0	0	0.0582011	23	57	0	4	3.04	23.1557	0.340893	8	0	65
185	2019	0	0	0.0582011	24	58	0	4	3.34	23.2274	0.3178	8	0	65
185	2020	0	0	0.0582011	26	59	0	5	2.91	23.3294	0.317089	8	0	65
186	2015	2.19722	2.94444	0.18523	26	50	1	3	3.2	21.1921	0.447383	8	0	39
186	2016	2.07944	1.09861	0.18523	21	51	1	3	3.03	21.9673	0.712472	8	0	39
186	2017	1.94591	1.09861	0.18523	26	52	1	3	3.73	22.5468	0.571873	8	0	39
186	2018	0	1.09861	0.18523	23	53	1	3	4.12	22.5153	0.572141	8	0	39
186	2019	0	0	0.18523	26	54	1	3	3.5	22.8744	0.592714	8	0	39
186	2020	1.38629	1.09861	0.18523	17	55	1	3	3.43	22.9971	0.543044	8	0	39
187	2015	0	1.09861	0.22801	7.4	44	1	2	38.8	21.2062	0.231842	8	0	39
187	2016	1.94591	1.09861	0.22801	3.6	45	1	2	24.1	21.2186	0.258871	8	0	39
187	2017	1.09861	2.07944	0.22801	20	46	1	2	15.7	21.1944	0.189519	8	0	39
187	2018	0	2.30259	0.22801	3.8	47	1	2	33.5	21.0601	0.201051	8	0	39
187	2019	0	3.13549	0.22801	21	48	1	6	10.6	21.3076	0.294951	8	0	39
187	2020	2.19722	3.55535	0.22801	20	49	1	6	9.53	21.3558	0.211868	8	0	39
188	2015	1.94591	3.04452	0.315853	29	47	1	3	3.68	21.0285	0.0993488	8	0	38
188	2016	1.38629	2.89037	0.315853	28	48	1	3	4.29	21.1199	0.0978003	8	0	38
188	2017	2.48491	3.93183	0.315853	25	49	1	3	5.14	21.2319	0.109984	8	0	38
188	2018	2.07944	4.21951	0.315853	26	50	1	3	7.15	21.2135	0.181081	8	0	38
188	2019	2.56495	4.29046	0.315853	26	51	1	3	5.92	21.2253	0.165156	8	0	38
188	2020	1.94591	4.00733	0.315853	24	52	1	3	4.85	21.487	0.296934	8	0	38
189	2015	1.09861	0	0.47339	29	54	0	5	4.7	20.9558	0.0686024	8	0	27
189	2016	1.38629	0	0.47339	29	55	0	5	6.43	21.1093	0.0564805	8	0	27
189	2017	0.693147	0	0.47339	28	56	0	5	7.66	21.2991	0.139794	8	0	27
189	2018	1.79176	0	0.47339	27	57	0	5	7.88	21.3464	0.0871564	8	0	27
189	2019	1.38629	1.38629	0.47339	25	58	0	5	8.36	21.4906	0.0849969	8	0	27
189	2020	1.38629	0	0.47339	23	59	0	5	9.32	22.1004	0.136287	8	0	27
190	2015	0	0	0.0933451	24	52	0	4	6.52	20.8602	0.303731	8	0	38
190	2016	1.09861	1.09861	0.0933451	21	53	0	4	5.2	21.3144	0.490318	8	0	38
190	2017	0.693147	2.30259	0.0933451	18	54	0	4	3.91	21.4253	0.510727	8	0	38
190	2018	1.38629	2.19722	0.0933451	17	55	0	4	3.95	21.596	0.538702	8	0	38
190	2019	1.38629	1.79176	0.0933451	16	56	0	4	4.65	21.678	0.47912	8	0	38
190	2020	0.693147	1.79176	0.0933451	18	57	0	4	4.48	21.7114	0.460358	8	0	38
191	2015	2.19722	0	0.149841	21	48	1	6	7.07	20.789	0.445802	8	0	30
191	2016	0.693147	0	0.149841	23	49	1	6	7.01	21.3249	0.331969	8	0	30
191	2017	1.09861	0	0.149841	21	50	1	6	4.85	22.0348	0.500409	8	0	30
191	2018	0.693147	0	0.149841	22	51	1	6	4.62	22.3696	0.551782	8	0	30
191	2019	1.38629	0	0.149841	13	52	1	6	4.52	22.215	0.443619	8	0	30
191	2020	1.60944	0	0.149841	16	53	1	5	4.64	22.2991	0.485179	8	0	30
192	2015	1.09861	3.04452	0.238247	16	53	1	3	5.9	20.4722	0.306581	8	0	40
192	2016	1.38629	3.04452	0.238247	16	54	1	3	6.12	21.1607	0.257639	8	0	40
192	2017	2.3979	3.13549	0.238247	20	55	1	3	5.16	21.7718	0.287865	8	0	40
192	2018	2.30259	3.29584	0.238247	21	56	1	3	8.24	21.8889	0.364493	8	0	35
192	2019	2.48491	3.8712	0.238247	-1.4	57	1	3	11.6	21.6091	0.608257	8	0	35
192	2020	2.70805	3.58352	0.238247	-1.3	58	1	3	9.36	21.5118	0.713931	8	0	35
193	2015	1.38629	2.63906	0.122143	27	34	0	3	5.37	20.3057	0.262975	8	0	35
193	2016	1.38629	3.43399	0.122143	26	35	0	3	5.06	20.7322	0.243246	8	0	35
193	2017	1.38629	3.71357	0.122143	21	36	0	3	5.38	20.9106	0.324312	8	0	35
193	2018	1.38629	3.7612	0.122143	20	37	0	3	5.62	21.032	0.385132	8	0	35
193	2019	0	3.91202	0.122143	24	38	0	3	6.91	21.1401	0.446987	8	0	35
193	2020	0	4.09434	0.122143	22	39	0	3	4.94	21.2875	0.495507	8	0	35
194	2015	1.38629	2.07944	0.283153	31	39	0	4	3.96	20.5001	0.152971	7	0	39
194	2016	1.79176	2.30259	0.283153	28	40	1	4	5.42	20.5358	0.137406	7	0	39
194	2017	1.60944	2.94444	0.283153	26	41	1	4	6.54	20.6899	0.166887	7	0	39
194	2018	1.79176	3.4012	0.283153	25	42	1	4	7.14	20.7113	0.144584	7	0	39
194	2019	2.19722	2.77259	0.283153	25	43	1	4	8.59	20.7351	0.131036	7	0	39
194	2020	1.60944	2.99573	0.283153	25	44	1	4	9.29	20.7975	0.169157	7	0	39
195	2015	1.60944	2.56495	0.315227	24	55	0	3	5.15	21.0857	0.456288	7	0	35
195	2016	0	2.30259	0.315227	25	56	0	3	5.65	21.3144	0.523338	7	0	35
195	2017	1.38629	2.30259	0.315227	29	57	0	3	4.52	21.5848	0.537062	7	0	35
195	2018	0.693147	1.79176	0.315227	25	58	0	3	4.36	21.6929	0.559178	7	0	35
195	2019	0.693147	2.63906	0.315227	22	59	0	3	4.98	21.776	0.544205	7	0	35
195	2020	0	2.70805	0.315227	25	60	0	3	4.71	22.0122	0.559443	7	0	35
196	2015	2.19722	2.30259	0.154359	25	67	1	1	3.47	20.3607	0.166664	7	0	34
196	2016	1.94591	1.60944	0.154359	24	67	1	1	3.8	20.9625	0.0939295	7	0	34
196	2017	0.693147	2.3979	0.154359	22	67	1	1	3.11	21.1401	0.228119	7	0	34
196	2018	2.07944	1.79176	0.154359	23	67	1	1	4.72	21.128	0.242998	7	0	34
196	2019	0.693147	1.94591	0.154359	19	67	1	1	4.32	21.067	0.20254	7	0	34
196	2020	0	0.693147	0.154359	21	67	1	1	4.73	21.1213	0.222768	7	0	34
197	2015	0.693147	2.3979	0.361875	26	54	1	4	5.57	20.4485	0.17007	7	0	38
197	2016	1.60944	2.63906	0.361875	23	55	1	4	6.52	20.6113	0.22827	7	0	38
197	2017	1.60944	1.38629	0.361875	19	56	1	4	6.29	21.8843	0.36725	7	0	38
197	2018	2.77259	1.09861	0.361875	23	57	1	4	5.03	22.0194	0.387411	7	0	38
197	2019	1.60944	2.07944	0.361875	22	58	1	4	5.25	22.2904	0.510668	7	0	38
197	2020	0.693147	2.83321	0.361875	23	59	1	4	6.46	22.3185	0.517529	7	0	38
198	2015	1.38629	4.00733	0.460397	23	46	1	2	6.64	23.7433	0.490878	7	0	39
198	2016	2.63906	3.89182	0.460397	20	47	1	2	9.09	23.8933	0.408701	7	0	39
198	2017	2.30259	3.73767	0.460397	23	48	1	2	6.65	24.299	0.529807	7	0	39
198	2018	1.38629	3.82864	0.460397	18	49	1	2	5.34	24.4877	0.603916	7	0	39
198	2019	2.19722	3.04452	0.460397	21	50	1	3	5.42	24.574	0.522896	7	0	39
198	2020	2.30259	2.99573	0.460397	24	51	1	3	3.9	25.1	0.468196	7	0	39
199	2015	0.693147	1.09861	0.374106	19	52	1	4	4.08	21.0429	0.395368	7	0	38
199	2016	0	1.38629	0.374106	21	53	1	4	3.99	21.366	0.498408	7	0	38
199	2017	1.38629	1.60944	0.374106	21	54	1	4	4.05	22.0248	0.45151	7	0	38
199	2018	0.693147	2.94444	0.374106	20	55	1	4	4.47	22.3412	0.531321	7	0	38
199	2019	1.38629	2.19722	0.374106	15	56	1	4	4.3	22.4093	0.535915	7	0	38
199	2020	1.60944	2.77259	0.374106	14	57	1	4	4.9	22.6633	0.620337	7	0	38
200	2015	0	0	0.159765	18	47	1	3	4.57	20.9539	0.215364	7	0	35
200	2016	0	0	0.159765	14	48	1	3	4.88	21.0736	0.307892	7	0	35
200	2017	0.693147	2.56495	0.159765	8.2	49	1	3	5.21	21.2334	0.404759	7	0	35
200	2018	1.09861	0	0.159765	-1.3	50	1	3	5.67	21.1344	0.522326	7	0	35
200	2019	0.693147	0	0.159765	15	51	1	3	4.07	21.157	0.529082	7	0	35
200	2020	0	1.09861	0.159765	-2.4	52	1	3	9.9	21.0241	0.640667	7	0	35
201	2015	1.38629	0	0.131928	24	54	1	4	6.84	20.5745	0.262616	7	0	39
201	2016	1.38629	0	0.131928	17	55	1	4	6.33	20.6582	0.292781	7	0	39
201	2017	1.79176	1.09861	0.131928	24	56	1	4	3.53	21.2977	0.326642	7	0	39
201	2018	0	0.693147	0.131928	26	57	1	4	6.3	21.5517	0.36041	7	0	39
201	2019	0	0	0.131928	-6	57	1	4	6.7	21.278	0.467636	7	0	39
201	2020	0	0	0.131928	8.6	58	0	4	4.79	21.0616	0.34702	7	0	39
202	2015	2.07944	2.89037	0.323269	27	50	1	3	5.79	21.2636	0.575773	7	0	35
202	2016	2.77259	2.70805	0.323269	26	51	1	3	4.86	21.6053	0.609201	7	0	35
202	2017	2.30259	4.64439	0.323269	24	52	1	3	5.65	22.6181	0.581662	7	0	35
202	2018	2.99573	5.14166	0.323269	27	53	1	1	7.29	22.8545	0.591444	7	0	35
202	2019	2.94444	5.83481	0.323269	25	54	1	3	11.4	22.9763	0.549827	7	0	35
202	2020	1.94591	6.23832	0.323269	27	55	1	3	11.8	23.2619	0.556552	7	0	35
203	2015	1.60944	0	0.160574	25	45	0	4	13.3	20.605	0.325444	7	0	65
203	2016	1.09861	0	0.160574	21	46	0	4	15.4	20.8482	0.332519	7	0	65
203	2017	0	0	0.160574	31	47	0	4	10	21.7161	0.232373	7	0	65
203	2018	0	0	0.160574	25	48	0	4	12.6	21.8477	0.234055	7	0	65
203	2019	1.09861	1.09861	0.160574	26	49	0	4	14.1	22.0013	0.268629	7	0	65
203	2020	1.60944	0.693147	0.160574	26	50	0	4	16.7	22.3813	0.204293	7	0	65
204	2015	0.693147	0	0.27838	26	51	1	3	2.83	20.3057	0.207096	7	0	27
204	2016	1.09861	0	0.27838	27	52	1	3	2.79	20.3057	0.214771	7	0	27
204	2017	1.09861	0	0.27838	27	53	1	3	2.53	20.3174	0.249357	7	0	27
204	2018	0.693147	0	0.27838	28	54	1	3	3.31	20.3804	0.213965	7	0	27
204	2019	1.60944	0	0.27838	28	55	1	3	3.49	20.5128	0.26364	7	0	27
204	2020	0.693147	0	0.27838	28	55	1	3	3.41	20.6189	0.272733	7	0	27
205	2015	0	0	0.0838841	20	48	0	2	5.08	20.5802	0.140334	7	0	65
205	2016	0	0	0.0838841	6.7	49	0	2	8.08	21.2537	0.385819	7	0	65
205	2017	0	0	0.0838841	-0.48	50	0	2	4.93	21.5286	0.51119	7	0	65
205	2018	0	0	0.0838841	17	51	0	2	3.02	21.5939	0.491062	7	0	65
205	2019	0	0	0.0838841	17	52	0	2	2.99	21.6024	0.438437	7	0	65
205	2020	0	0	0.0838841	-1.2	53	0	2	3.33	21.3856	0.700052	7	0	65
206	2015	1.38629	0.693147	0.08916	18	47	1	4	6.56	20.3057	0.254334	7	0	35
206	2016	1.38629	2.19722	0.08916	14	48	1	4	7.11	20.3057	0.369188	7	0	35
206	2017	0	1.09861	0.08916	13	49	1	4	7.05	21.1849	0.463111	7	0	35
206	2018	1.09861	1.94591	0.08916	18	50	1	4	7.32	21.1678	0.267715	7	0	35
206	2019	1.09861	2.83321	0.08916	17	51	1	4	7.39	21.1798	0.290932	7	0	35
206	2020	0	1.09861	0.08916	-1.6	52	1	4	9.34	21.0793	0.492546	7	0	35
207	2015	2.3979	2.3979	0.14599	23	44	1	6	5.72	21.4079	0.37061	7	0	39
207	2016	2.70805	3.4012	0.14599	19	45	1	6	5.44	21.5827	0.387022	7	0	39
207	2017	2.30259	3.21888	0.14599	24	46	1	6	4.08	22.1321	0.340674	7	0	39
207	2018	2.48491	2.70805	0.14599	23	47	1	6	4.94	22.4093	0.448741	7	0	39
207	2019	2.48491	2.30259	0.14599	22	48	1	6	4.46	22.6681	0.52437	7	0	39
207	2020	2.07944	1.60944	0.14599	21	49	1	6	3.95	22.9942	0.614895	7	0	39
208	2015	0	0	0.105107	23	52	1	4	11.1	20.3057	0.315205	7	0	38
208	2016	0	1.60944	0.105107	27	53	1	4	7.23	20.7244	0.391132	7	0	38
208	2017	1.38629	2.19722	0.105107	26	54	1	4	8.61	20.8379	0.369881	7	0	38
208	2018	0.693147	2.30259	0.105107	12	55	1	4	10.4	20.7807	0.334352	7	0	38
208	2019	0.693147	1.38629	0.105107	1.9	56	1	4	15.6	20.5735	0.359733	7	0	38
208	2020	1.60944	2.3979	0.105107	21	57	1	4	7.97	20.7702	0.414017	7	0	38
209	2015	0.693147	0.693147	0.244714	27	51	1	5	7	21.3884	0.0496506	7	0	27
209	2016	0.693147	0	0.244714	29	53	1	5	14.4	21.5192	0.0535182	7	0	27
209	2017	0	1.09861	0.244714	29	54	1	5	3.48	21.6207	0.0545822	7	0	27
209	2018	0	0.693147	0.244714	28	55	1	5	3.69	21.7387	0.074287	7	0	27
209	2019	0	0.693147	0.244714	23	56	1	5	5.57	21.7548	0.0496506	7	0	27
209	2020	1.09861	0	0.244714	24	57	1	5	8.84	21.8189	0.0496506	7	0	27
210	2015	0	0	0.339317	31	47	0	2	1.91	20.3057	0.296564	7	0	65
210	2016	0.693147	0	0.339317	31	48	0	2	1.48	20.7178	0.519504	7	0	65
210	2017	0	0	0.339317	21	50	0	2	1.72	20.8093	0.539061	7	0	65
210	2018	0	1.94591	0.339317	28	51	0	2	1.79	20.9137	0.395483	7	0	65
210	2019	0	0	0.339317	13	52	0	6	1.66	20.697	0.233228	7	0	65
210	2020	1.79176	0	0.339317	26	53	0	6	1.96	20.8089	0.308365	7	0	65
211	2015	3.43399	2.99573	0.444029	16	50	0	3	10.2	21.4498	0.10481	24	1	39
211	2016	2.94444	1.94591	0.444029	54	51	0	3	10.8	21.4677	0.109441	24	1	39
211	2017	2.99573	1.79176	0.444029	21	52	0	3	12.1	21.7341	0.118895	24	1	39
211	2018	1.79176	0.693147	0.444029	18	53	0	3	11.2	21.7194	0.0923472	24	1	39
211	2019	2.94444	0.693147	0.444029	24	54	0	3	11.7	21.9448	0.0936687	24	1	39
211	2020	3.49651	0.693147	0.444029	27	55	0	3	8.68	22.079	0.142173	24	1	39
212	2015	0	0	0.478417	27	45	0	2	1.01	20.3756	0.312078	23	0	27
212	2016	0	0	0.478417	22	46	0	2	1.01	21.5521	0.712666	23	0	27
212	2017	0	0	0.478417	29	47	0	2	1.01	21.5692	0.122162	23	0	27
212	2018	0	0	0.478417	29	48	0	2	1.01	21.6523	0.108566	23	0	27
212	2019	1.60944	0.693147	0.478417	31	49	0	2	1.16	21.7411	0.115798	23	0	27
212	2020	1.60944	0	0.478417	30	50	0	2	1.01	21.8031	0.12088	23	0	27
213	2015	2.19722	2.63906	0.385566	55	42	0	4	3.7	22.3424	0.397231	22	0	38
213	2016	1.09861	1.38629	0.385566	68	43	0	4	4.16	22.4533	0.41415	22	0	38
213	2017	0.693147	0.693147	0.385566	26	44	0	4	3.91	22.5946	0.46281	22	0	38
213	2018	0.693147	4.38203	0.385566	25	45	0	4	3.85	22.6108	0.434334	22	0	38
213	2019	0.693147	4.72739	0.385566	28	46	0	4	4.08	22.5701	0.406954	22	0	38
213	2020	1.60944	5.35186	0.385566	29	47	0	4	3.93	22.5917	0.391107	22	0	38
214	2015	1.38629	2.94444	0.247395	1.8	50	0	2	6.88	21.7216	0.670948	22	1	35
214	2016	1.09861	2.19722	0.247395	56	51	0	2	5.17	21.4614	0.563941	22	1	35
214	2017	1.79176	1.09861	0.247395	13	52	0	2	3.51	21.4356	0.533256	22	1	35
214	2018	0	3.3673	0.247395	8.4	53	0	2	4.01	21.4422	0.438506	22	1	35
214	2019	1.09861	3.21888	0.247395	13	54	0	2	6.07	21.6124	0.514949	22	1	35
214	2020	1.38629	3.17805	0.247395	14	55	0	2	4.82	21.6309	0.504299	22	1	35
215	2015	2.83321	0	0.275326	25	44	0	3	9.57	23.1653	0.0990662	22	0	27
215	2016	2.89037	0	0.275326	25	45	0	3	10.7	23.3856	0.101581	22	0	27
215	2017	2.94444	0	0.275326	24	46	0	3	12.7	23.6158	0.1162	22	0	27
215	2018	3.04452	1.60944	0.275326	25	47	0	3	15.3	23.8306	0.11464	22	0	27
215	2019	3.63759	0.693147	0.275326	26	48	0	3	16.7	24.0395	0.0950393	22	0	27
215	2020	4.04305	0	0.275326	24	49	1	3	18	24.2709	0.113522	22	0	27
216	2015	0.693147	0.693147	0.149522	21	33	0	2	4.16	21.7197	0.363497	22	0	27
216	2016	0.693147	2.30259	0.149522	32	33	0	2	3.39	21.8157	0.291579	22	0	27
216	2017	0	1.94591	0.149522	27	33	0	2	3.29	21.9195	0.333635	22	0	27
216	2018	0.693147	3.66356	0.149522	28	34	0	2	3.05	21.8579	0.326526	22	0	27
216	2019	0	3.09104	0.149522	31	35	1	2	3.74	21.922	0.330339	22	0	27
216	2020	0	2.30259	0.149522	31	36	1	2	3.64	21.9639	0.328422	22	0	27
217	2015	0.693147	0	0.437598	20	43	1	2	5.51	21.8437	0.405971	22	0	39
217	2016	0	0.693147	0.437598	66	44	1	2	5.76	21.847	0.393898	22	0	39
217	2017	0.693147	0	0.437598	25	45	1	2	5.97	21.8675	0.388412	22	0	39
217	2018	0.693147	1.09861	0.437598	27	46	1	2	5.48	21.8792	0.385962	22	0	39
217	2019	1.09861	1.60944	0.437598	22	47	1	2	5.88	21.9093	0.37825	22	0	39
217	2020	0	1.09861	0.437598	-2.5	48	1	2	8.55	22.0052	0.413872	22	0	39
218	2015	3.13549	3.66356	0.405955	28	52	0	4	3.54	23.2041	0.467366	21	1	38
218	2016	4.06044	3.95124	0.405955	28	53	0	4	3.54	23.5982	0.472313	21	1	38
218	2017	4.39445	2.70805	0.405955	21	54	0	4	4.25	23.6798	0.522785	21	1	38
218	2018	4.45435	2.48491	0.405955	19	55	0	4	3.26	23.8354	0.589912	21	1	38
218	2019	3.98898	2.77259	0.405955	16	56	0	4	2.72	23.8455	0.588331	21	1	38
218	2020	4.31749	2.94444	0.405955	16	57	0	4	3.16	23.7558	0.547815	21	1	38
219	2015	4.09434	4.45435	0.175196	16	41	0	4	3.08	24.8012	0.732524	22	1	35
219	2016	3.7612	4.27667	0.175196	21	42	0	4	3.5	24.8312	0.728936	22	1	35
219	2017	3.66356	4.29046	0.175196	21	43	0	4	3.32	24.9357	0.750761	22	1	35
219	2018	3.3673	5.15329	0.175196	22	44	0	4	3.26	24.9803	0.750525	22	1	35
219	2019	3.63759	4.74493	0.175196	20	45	0	4	3.71	25.0329	0.750425	22	1	35
219	2020	3.93183	5.09987	0.175196	14	46	0	4	3.75	25.0968	0.784731	22	1	35
220	2015	2.63906	4.12713	0.312316	17	45	0	3	2.81	21.7632	0.624095	22	1	38
220	2016	2.19722	4.06044	0.312316	18	46	0	3	2.64	22.1488	0.551604	22	1	38
220	2017	2.07944	2.83321	0.312316	17	47	0	3	2.34	22.3121	0.601672	22	1	38
220	2018	1.79176	4.11087	0.312316	17	48	0	3	1.99	22.3554	0.606004	22	1	38
220	2019	2.19722	3.29584	0.312316	17	49	0	3	2.09	22.6249	0.671394	22	1	38
220	2020	1.38629	4.2485	0.312316	29	50	0	3	2.31	22.7659	0.662861	22	1	38
221	2015	0	0	0.458886	19	51	0	4	4.28	21.2399	0.146801	22	1	39
221	2016	1.38629	0	0.458886	12	52	0	4	4.68	21.2268	0.146613	22	1	39
221	2017	0	0	0.458886	29	53	0	4	5.44	21.2638	0.090146	22	1	39
221	2018	0	0	0.458886	29	54	0	4	4.06	21.4241	0.0564187	22	1	39
221	2019	0	0.693147	0.458886	22	55	0	4	4.65	21.4626	0.0655889	22	1	39
221	2020	0	0	0.458886	20	56	0	4	7.86	21.5021	0.0829655	22	1	39
222	2015	0	1.09861	0.107896	3.5	54	1	3	11.3	20.3057	0.323402	20	0	39
222	2016	0.693147	1.60944	0.107896	0.55	55	1	3	9.88	20.3057	0.292886	20	0	39
222	2017	0	1.09861	0.107896	3.2	56	1	3	15.4	20.3057	0.329817	20	0	39
222	2018	0	0	0.107896	15	57	1	3	12	20.3057	0.338153	20	0	39
222	2019	0	1.38629	0.107896	-2.2	58	1	3	22.5	20.3057	0.391008	20	0	39
222	2020	2.07944	0	0.107896	0.76	59	1	3	16	20.3057	0.41587	20	0	39
223	2015	1.79176	1.94591	0.11299	13	61	1	6	5.44	21.5479	0.648582	18	0	39
223	2016	2.48491	2.70805	0.11299	48	62	1	6	6.79	21.7107	0.679217	18	0	39
223	2017	1.38629	2.70805	0.11299	10	63	1	6	9.35	21.7864	0.520186	18	0	39
223	2018	2.30259	2.94444	0.11299	0.18	64	1	6	14.5	21.672	0.583246	18	0	39
223	2019	1.60944	2.3979	0.11299	14	65	1	6	10.3	21.6737	0.586613	18	0	39
223	2020	1.09861	3.29584	0.11299	5.8	66	1	6	11.1	21.664	0.588102	18	0	39
224	2015	5.38907	7.79934	0.433601	26	45	0	6	4	24.3844	0.740259	21	1	36
224	2016	6.07304	7.1869	0.433601	59	46	0	6	4.11	24.6195	0.685693	21	1	36
224	2017	6.18002	7.47986	0.433601	11	47	0	6	4.06	24.519	0.657399	21	1	36
224	2018	6.18002	7.34601	0.433601	9.2	48	0	6	4.25	24.5838	0.711004	21	1	36
224	2019	6.18002	6.39359	0.433601	0.67	49	0	6	3.39	24.5041	0.687504	21	1	36
224	2020	6.18002	4.14313	0.433601	1.1	50	0	4	4.23	24.4637	0.669645	21	1	36
225	2015	3.95124	3.93183	0.284136	-3.8	51	0	4	10.7	22.1914	0.442772	19	0	39
225	2016	3.52636	3.73767	0.284136	39	52	0	4	9.91	22.3501	0.391831	19	0	39
225	2017	3.68888	3.17805	0.284136	22	53	0	4	10.2	22.5566	0.49213	19	0	39
225	2018	3.29584	3.68888	0.284136	19	54	0	4	11.6	22.8184	0.483991	19	0	39
225	2019	3.46574	3.3673	0.284136	21	55	0	4	13.7	22.9108	0.52451	19	0	39
225	2020	2.07944	4.26268	0.284136	27	56	0	4	11.3	23.0097	0.541954	19	0	39
226	2015	0	0	0.237152	15	56	0	5	4.26	21.1151	0.502173	21	1	38
226	2016	0.693147	0	0.237152	58	57	0	5	5.97	21.7035	0.291477	21	1	38
226	2017	0	0	0.237152	16	58	0	5	5.24	21.7472	0.302911	21	1	38
226	2018	0	0	0.237152	15	59	1	5	4.72	21.727	0.311356	21	1	38
226	2019	0	0	0.237152	13	60	0	5	4.61	21.9157	0.43499	21	1	38
226	2020	0	0	0.237152	19	61	0	5	4.07	22.0112	0.447455	21	1	38
227	2015	1.38629	3.85015	0.325	25	45	0	3	2.64	21.7324	0.284033	18	1	27
227	2016	1.38629	3.04452	0.325	25	46	0	3	2.23	21.8325	0.312725	18	1	27
227	2017	1.38629	2.30259	0.325	27	47	0	3	2.64	21.9132	0.318148	18	1	27
227	2018	3.7612	2.83321	0.325	29	48	0	3	3.55	21.9681	0.300224	18	1	27
227	2019	2.3979	3.61092	0.325	32	49	0	3	2.98	22.0615	0.310216	18	1	27
227	2020	2.63906	3.21888	0.325	31	50	0	3	2.71	22.1652	0.34685	18	1	27
228	2015	1.94591	3.09104	0.317619	24	37	0	3	4.11	22.9077	0.509349	19	1	36
228	2016	1.09861	3.04452	0.317619	24	38	0	3	4.48	23.0273	0.519146	19	1	36
228	2017	1.79176	3.21888	0.317619	26	39	0	3	3.99	23.1957	0.548684	19	1	36
228	2018	1.79176	3.4012	0.317619	21	40	0	3	3.82	23.3091	0.564533	19	1	36
228	2019	1.38629	2.3979	0.317619	19	41	0	3	4.13	23.3784	0.539243	19	1	36
228	2020	0.693147	0	0.317619	23	42	0	3	3.78	23.4964	0.573526	19	1	36
229	2015	2.56495	2.83321	0.538355	28	44	0	3	2.7	22.2197	0.493966	19	0	26
229	2016	2.89037	2.99573	0.538355	21	45	0	3	4.56	22.2149	0.508463	19	0	38
229	2017	2.56495	3.13549	0.538355	18	46	0	3	4.92	22.0723	0.458716	19	0	38
229	2018	2.30259	3.2581	0.538355	22	47	0	3	3.39	22.0813	0.414846	19	0	38
229	2019	2.63906	3.29584	0.538355	26	47	0	3	4.07	22.0728	0.403929	19	0	38
229	2020	0.693147	3.55535	0.538355	20	48	0	3	4.17	22.1364	0.461561	19	0	38
230	2015	2.89037	3.63759	0.400859	26	42	0	2	3.82	23.463	0.657225	19	0	38
230	2016	3.17805	3.29584	0.400859	29	43	0	2	3.95	23.7056	0.656001	19	0	38
230	2017	2.56495	3.63759	0.400859	29	44	0	2	4.11	24.0636	0.608106	19	0	38
230	2018	3.09104	4.29046	0.400859	30	45	0	2	4	24.3168	0.628709	19	0	38
230	2019	3.3322	3.95124	0.400859	29	46	0	2	4.6	24.4429	0.600834	19	0	38
230	2020	2.94444	3.91202	0.400859	26	47	0	6	4.71	24.6045	0.518571	19	0	38
231	2015	0.693147	2.30259	0.219237	-1.8	43	0	4	3.11	20.4851	0.398322	20	0	38
231	2016	1.94591	2.07944	0.219237	10	44	0	4	3.24	20.5142	0.404779	20	0	38
231	2017	0	2.19722	0.219237	9.5	45	0	4	3.51	20.5839	0.435803	20	0	38
231	2018	0.693147	2.19722	0.219237	9.4	45	0	4	3.53	20.69	0.485429	20	0	38
231	2019	0	2.07944	0.219237	-2.1	46	0	4	3.68	20.6752	0.56077	20	0	38
231	2020	0.693147	0.693147	0.219237	11	47	0	4	3.82	20.6141	0.520462	20	0	38
232	2015	3.04452	0	0.319534	21	54	0	3	7.79	22.4308	0.325472	19	0	27
232	2016	3.21888	0	0.319534	30	55	0	3	8.89	22.6293	0.319422	19	0	27
232	2017	2.89037	1.94591	0.319534	29	56	1	3	8.76	22.8355	0.388553	19	0	27
232	2018	2.63906	3.04452	0.319534	18	57	1	3	10.2	23.0619	0.594233	19	0	27
232	2019	3.04452	2.89037	0.319534	29	58	0	3	10.2	23.0962	0.461408	19	0	27
232	2020	3.21888	1.09861	0.319534	32	59	0	3	10.6	23.2875	0.482394	19	0	27
233	2015	1.38629	2.94444	0.177365	29	42	0	3	3.42	23.4771	0.338337	20	0	38
233	2016	1.60944	3.04452	0.177365	30	43	0	3	3.23	23.7414	0.408727	20	0	38
233	2017	2.77259	3.7612	0.177365	28	44	0	3	3.49	24.012	0.337321	20	0	38
233	2018	3.13549	4.27667	0.177365	30	45	0	3	3.16	24.1892	0.391393	20	0	38
233	2019	2.63906	4.12713	0.177365	28	46	0	3	2.84	24.417	0.465351	20	0	38
233	2020	3.04452	4.06044	0.177365	29	47	0	3	2.76	24.5765	0.48551	20	0	38
234	2015	2.19722	0.693147	0.355968	12	47	0	3	4.5	22.8081	0.784822	21	1	38
234	2016	2.07944	4.18965	0.355968	49	48	0	3	4.8	22.9905	0.784822	21	1	38
234	2017	2.30259	4.33073	0.355968	9.7	49	0	3	4.35	22.9306	0.784822	21	1	38
234	2018	2.07944	3.98898	0.355968	-1.9	50	0	3	5.69	22.7082	0.784822	21	1	38
234	2019	1.38629	4.02535	0.355968	12	51	0	3	4.73	22.6314	0.784822	21	1	38
234	2020	0	4.59512	0.355968	11	52	0	3	5.12	22.4533	0.784822	21	1	38
235	2015	0.693147	0	0.354495	33	46	0	4	38.8	22.1034	0.357955	19	0	65
235	2016	0.693147	0	0.354495	23	47	0	4	38.8	22.2381	0.446517	19	0	65
235	2017	0.693147	2.70805	0.354495	29	48	0	4	38.8	22.4901	0.438533	19	0	65
235	2018	0	1.60944	0.354495	27	49	0	4	38.8	22.5504	0.450738	19	0	65
235	2019	1.38629	0	0.354495	31	50	0	4	38.8	22.8467	0.414633	19	0	65
235	2020	2.99573	2.19722	0.354495	26	51	0	4	35.8	23.023	0.494766	19	0	65
236	2015	1.09861	0.693147	0.0989832	27	39	0	3	27.9	21.1803	0.299625	20	0	65
236	2016	0.693147	0	0.0989832	23	40	0	3	26.2	21.2641	0.283405	20	0	65
236	2017	0.693147	0	0.0989832	1.8	41	0	3	36	21.5013	0.256547	20	0	65
236	2018	0	0	0.0989832	33	42	0	3	34.2	21.2008	0.293872	20	0	65
236	2019	0	0	0.0989832	30	43	0	3	34.2	21.1342	0.329473	20	0	65
236	2020	1.60944	0	0.0989832	14	44	0	3	31.4	21.2324	0.370331	20	0	65
237	2015	2.19722	1.09861	0.245674	22	49	0	4	8.83	21.7542	0.251747	20	1	34
237	2016	2.07944	2.30259	0.245674	20	50	0	4	9.46	21.6857	0.265493	20	1	34
237	2017	1.38629	2.3979	0.245674	19	51	0	4	8.67	21.7562	0.312067	20	1	34
237	2018	1.60944	2.48491	0.245674	18	52	0	4	8.48	21.7027	0.299849	20	1	34
237	2019	1.38629	2.94444	0.245674	21	53	0	4	9.62	21.739	0.28596	20	1	34
237	2020	1.60944	1.60944	0.245674	22	54	1	4	9.32	21.8027	0.296003	20	1	34
238	2015	0.693147	0	0.243254	19	50	0	4	3.17	22.4438	0.364657	18	0	27
238	2016	1.09861	0.693147	0.243254	23	51	0	4	5.13	22.6087	0.363667	18	0	27
238	2017	2.30259	0	0.243254	24	52	0	4	5.76	22.6966	0.354848	18	0	27
238	2018	2.07944	1.38629	0.243254	4.5	53	0	4	3.85	22.5913	0.3961	18	0	27
238	2019	1.38629	1.38629	0.243254	29	55	0	4	3.53	22.4492	0.337303	18	0	27
238	2020	1.09861	0.693147	0.243254	30	56	0	4	4.28	22.377	0.337377	18	0	27
239	2015	0	1.09861	0.266637	12	41	0	3	6.7	22.2455	0.218798	28	1	39
239	2016	1.38629	0	0.266637	21	42	0	3	6.31	22.3658	0.250344	28	1	65
239	2017	1.60944	1.38629	0.266637	20	43	0	3	5.94	22.4183	0.273731	28	1	65
239	2018	1.79176	0.693147	0.266637	20	44	0	3	6.75	22.4349	0.2501	28	1	65
239	2019	1.09861	1.09861	0.266637	19	45	0	3	6.73	22.536	0.29792	28	1	65
239	2020	0.693147	0.693147	0.266637	18	46	0	3	6.52	22.5556	0.277377	28	1	65
240	2015	3.3322	3.04452	0.39929	30	61	1	5	9.93	23.2175	0.472275	26	1	65
240	2016	3.71357	3.82864	0.39929	58	62	1	5	11.2	23.1871	0.314513	26	1	65
240	2017	4.00733	4.48864	0.39929	29	63	1	5	13.4	23.2812	0.297485	26	1	65
240	2018	4.14313	4.21951	0.39929	-4	64	1	5	14.6	23.3319	0.335985	26	1	65
240	2019	5.23644	3.58352	0.39929	-4.4	65	1	5	12	23.3996	0.391344	26	1	65
240	2020	5.64545	3.2581	0.39929	26	66	1	5	12.6	23.521	0.485442	26	1	65
241	2015	1.38629	0	0.384235	17	51	1	3	2.84	21.9842	0.583877	26	0	65
241	2016	1.79176	0	0.384235	19	52	1	3	3.11	22.3163	0.440197	26	0	65
241	2017	0	0	0.384235	19	53	1	3	3.33	22.548	0.475888	26	0	65
241	2018	0.693147	0	0.384235	21	54	1	3	4.28	22.74	0.514615	26	0	65
241	2019	1.09861	1.38629	0.384235	27	55	1	3	5.97	23.0066	0.498578	26	0	65
241	2020	2.30259	1.94591	0.384235	4.5	56	1	3	7.02	23.0706	0.474231	26	0	65
242	2015	0	0	0.450417	68	56	0	3	1.69	25.0876	0.572164	26	1	36
242	2016	1.09861	0	0.450417	30	57	0	3	1.76	25.4018	0.57399	26	1	36
242	2017	0	1.09861	0.450417	29	58	0	3	1.8	25.5385	0.595256	26	1	36
242	2018	0.693147	2.30259	0.450417	28	59	0	3	3.27	25.6188	0.591375	26	1	36
242	2019	0.693147	0	0.450417	27	60	0	3	3.66	25.6587	0.578074	26	1	36
242	2020	1.38629	1.38629	0.450417	27	61	0	3	4.17	25.7368	0.613203	26	1	36
243	2015	0	0	0.378253	22	50	0	3	1.01	22.6871	0.367581	26	1	36
243	2016	0	0	0.378253	23	51	0	3	1.01	22.8467	0.413825	26	1	36
243	2017	0	0	0.378253	23	52	0	3	1.01	22.9025	0.415224	26	1	36
243	2018	0	0	0.378253	26	53	0	3	1.01	22.9593	0.409895	26	1	36
243	2019	0	0	0.378253	22	54	0	3	1.01	23.5036	0.576354	26	1	36
243	2020	0	2.30259	0.378253	26	55	0	3	1.38	23.6088	0.558455	26	1	36
244	2015	3.09104	5.27811	0.216189	23	50	0	4	4.73	22.4693	0.267228	26	1	35
244	2016	3.71357	5.45532	0.216189	64	51	0	4	4.54	22.5765	0.294238	26	1	35
244	2017	3.78419	5.33754	0.216189	16	52	0	4	4.69	22.6821	0.324039	26	1	35
244	2018	3.29584	5.8861	0.216189	25	53	0	4	4.07	22.7299	0.336429	26	1	35
244	2019	1.94591	5.80814	0.216189	25	54	0	4	4.86	22.7946	0.322088	26	1	35
244	2020	1.94591	5.94542	0.216189	25	55	0	4	4.21	23.0026	0.387523	26	1	35
245	2015	2.30259	3.95124	0.445167	52	46	0	4	5.29	22.3108	0.292716	26	1	39
245	2016	2.83321	3.04452	0.445167	24	47	0	4	5.12	22.3796	0.330073	26	1	39
245	2017	2.89037	3.98898	0.445167	16	48	0	4	4.89	22.4577	0.369581	26	1	39
245	2018	2.3979	4.12713	0.445167	24	49	0	4	5.24	22.5453	0.403055	26	1	39
245	2019	2.63906	3.66356	0.445167	25	50	0	4	5.26	22.5184	0.387298	26	1	39
245	2020	2.63906	3.91202	0.445167	26	51	0	4	6.3	22.5154	0.375806	26	1	39
246	2015	0	0	0.326727	20	53	1	6	2.73	21.8696	0.348355	28	0	35
246	2016	0	1.38629	0.326727	19	54	1	6	3.11	21.9778	0.370158	28	0	35
246	2017	0	1.09861	0.326727	20	55	1	6	3.27	22.0325	0.33673	28	0	35
246	2018	0	0.693147	0.326727	18	56	1	6	3.26	22.145	0.393852	28	0	35
246	2019	0	0	0.326727	15	57	1	6	3.23	22.2216	0.420116	28	0	35
246	2020	0	1.38629	0.326727	15	58	1	6	4.56	22.2659	0.432499	28	0	35
247	2015	1.09861	0	0.274356	32	49	0	4	3.15	22.2861	0.611104	28	1	65
247	2016	0.693147	0	0.274356	71	50	0	4	3.87	22.3643	0.60846	28	1	65
247	2017	0	0	0.274356	28	51	0	4	4.24	22.4585	0.60625	28	1	65
247	2018	0	1.60944	0.274356	30	52	0	4	3.83	22.5574	0.599671	28	1	65
247	2019	0	1.09861	0.274356	29	53	0	4	3.97	22.668	0.609077	28	1	65
247	2020	0	0.693147	0.274356	25	54	0	4	3.99	22.8464	0.653041	28	1	65
248	2015	0	0	0.396452	19	52	0	3	1.17	23.3006	0.669052	27	0	38
248	2016	0	0	0.396452	10	53	0	3	1.53	23.3341	0.567824	27	0	38
248	2017	0	0	0.396452	3.3	54	0	3	1.29	23.6606	0.68151	27	0	38
248	2018	0	0	0.396452	19	55	0	3	1.37	23.634	0.72888	27	0	38
248	2019	0	0	0.396452	19	56	0	3	1.72	23.5953	0.716488	27	0	38
248	2020	0	0	0.396452	-6.6	57	0	3	1.75	23.5482	0.784822	27	0	38
249	2015	1.38629	1.94591	0.427923	14	48	1	3	4.24	22.9156	0.636635	26	0	39
249	2016	2.19722	1.38629	0.427923	12	49	1	3	4.44	22.9952	0.661513	26	0	39
249	2017	1.60944	2.07944	0.427923	13	50	1	3	5.45	23.0393	0.660171	26	0	39
249	2018	2.89037	1.38629	0.427923	14	51	1	3	7.29	23.0675	0.649527	26	0	39
249	2019	2.19722	2.19722	0.427923	15	52	1	3	7.58	23.1828	0.611887	26	0	39
249	2020	2.70805	2.99573	0.427923	11	53	1	3	5.79	23.1829	0.581886	26	0	39
250	2015	1.09861	1.79176	0.193984	14	46	0	3	3.15	22.3585	0.394265	18	1	35
250	2016	0.693147	0.693147	0.193984	13	47	0	3	3.85	22.4337	0.422573	18	1	35
250	2017	0	1.09861	0.193984	14	48	0	3	3.29	22.6006	0.507194	18	1	35
250	2018	0	0.693147	0.193984	12	49	0	3	3.83	22.7959	0.574002	18	1	35
250	2019	0	1.38629	0.193984	18	50	0	3	2.93	23.0613	0.63291	18	1	35
250	2020	0.693147	1.79176	0.193984	19	51	0	3	2.86	23.4405	0.615672	18	1	35
251	2015	0	1.09861	0.367343	2.5	37	0	4	1.12	22.1016	0.381362	15	0	34
251	2016	0	1.94591	0.367343	14	38	0	4	2.08	22.1685	0.402198	15	0	34
251	2017	0	1.38629	0.367343	19	38	0	4	2.49	22.2157	0.391254	15	0	34
251	2018	0.693147	2.70805	0.367343	16	39	0	4	2.27	22.28	0.405239	15	0	34
251	2019	0	0.693147	0.367343	14	40	0	4	3.83	22.1665	0.301123	15	0	34
251	2020	0	3.13549	0.367343	20	41	0	4	4.82	22.3249	0.199179	15	0	34
252	2015	2.3979	1.38629	0.303228	19	48	0	4	5.03	23.0465	0.446186	10	0	30
252	2016	1.09861	1.79176	0.303228	24	49	0	4	4.88	23.6767	0.473534	10	0	30
252	2017	0	2.77259	0.303228	23	50	0	4	6.77	24.2162	0.566833	10	0	30
252	2018	0.693147	3.13549	0.303228	21	51	0	4	5.6	24.4036	0.575767	10	0	30
252	2019	0.693147	3.49651	0.303228	24	52	0	4	5.1	24.8059	0.522885	10	0	30
252	2020	1.60944	3.43399	0.303228	27	53	0	4	4.75	25.1964	0.593791	10	0	30
253	2015	0.693147	2.19722	0.201853	18	46	0	3	7.99	22.271	0.25426	11	0	35
253	2016	1.09861	3.09104	0.201853	20	47	0	3	5.05	22.3717	0.320145	11	0	35
253	2017	0.693147	3.04452	0.201853	25	48	0	3	4.38	22.5407	0.370841	11	0	35
253	2018	1.79176	3.63759	0.201853	28	49	0	3	4.08	22.7072	0.370808	11	0	35
253	2019	1.60944	3.68888	0.201853	28	50	0	3	4.47	22.8547	0.333779	11	0	35
253	2020	1.09861	3.91202	0.201853	29	51	0	3	3.93	23.086	0.307776	11	0	35
254	2015	0	0.693147	0.138533	18	33	0	3	3.37	22.0926	0.366583	11	0	35
254	2016	0.693147	1.38629	0.138533	7.9	33	0	3	3.45	22.0626	0.32069	11	0	35
254	2017	1.38629	1.79176	0.138533	15	33	0	3	3.18	22.1389	0.369783	11	0	35
254	2018	1.09861	1.79176	0.138533	10	34	0	3	3.43	22.216	0.433649	11	0	35
254	2019	1.09861	0	0.138533	11	35	0	3	3.25	22.2285	0.443016	11	0	35
254	2020	0.693147	2.99573	0.138533	27	36	0	3	3.02	22.1677	0.357157	11	0	35
255	2015	5.63121	6.24222	0.429098	68	45	0	4	3.63	24.9987	0.466186	11	0	36
255	2016	5.87493	6.21661	0.429098	23	46	0	4	3.23	25.2484	0.48701	11	0	36
255	2017	5.31812	6.30992	0.429098	26	47	0	4	3.35	25.4287	0.554416	11	0	36
255	2018	4.17439	6.64249	0.429098	30	48	0	4	4.05	25.44	0.528726	11	0	36
255	2019	5.22575	6.51619	0.429098	25	49	0	4	4.47	25.4515	0.519001	11	0	36
255	2020	5.52146	6.72143	0.429098	22	50	0	4	4.99	25.7603	0.627678	11	0	36
256	2015	2.19722	3.82864	0.348513	29	55	1	6	4.16	21.949	0.381957	11	0	36
256	2016	1.94591	3.82864	0.348513	27	56	1	6	4.05	22.4043	0.301065	11	0	36
256	2017	2.30259	4.67283	0.348513	29	57	1	6	4.21	22.5886	0.376736	11	0	36
256	2018	3.2581	5.18739	0.348513	30	58	1	6	3.56	22.7041	0.397205	11	0	36
256	2019	2.07944	5.35186	0.348513	30	59	1	6	3.78	22.8697	0.428908	11	0	36
256	2020	1.94591	5.59099	0.348513	30	60	1	6	4.21	23.1593	0.482026	11	0	36
257	2015	3.13549	5.48064	0.11483	31	53	1	4	4.16	23.2174	0.41285	12	0	38
257	2016	3.09104	6.33328	0.11483	75	54	1	4	3.7	24.2887	0.602485	12	0	38
257	2017	3.80666	5.83188	0.11483	29	55	1	4	3.39	24.511	0.534136	12	0	38
257	2018	3.4012	5.72685	0.11483	30	56	1	4	3.45	24.5857	0.532433	12	0	38
257	2019	4.26268	5.32788	0.11483	28	57	1	4	3.24	24.7356	0.548611	12	0	38
257	2020	3.3322	5.34711	0.11483	28	58	1	4	3.1	24.9613	0.549845	12	0	38
258	2015	2.19722	1.79176	0.124062	15	50	1	3	4.05	23.0815	0.422714	11	0	35
258	2016	1.09861	0	0.124062	16	51	1	3	4.29	23.2072	0.475375	11	0	35
258	2017	0	1.60944	0.124062	16	52	1	3	3.09	23.3223	0.510398	11	0	35
258	2018	0	1.38629	0.124062	17	53	1	3	2.03	23.4515	0.543188	11	0	35
258	2019	0	0	0.124062	8.9	54	1	3	3.45	23.5467	0.569399	11	0	35
258	2020	1.38629	2.07944	0.124062	14	55	1	3	3.82	23.5488	0.543758	11	0	35
259	2015	1.09861	0	0.272865	23	49	0	3	3.23	21.0191	0.27142	10	0	26
259	2016	1.09861	0	0.272865	16	50	0	3	3.61	21.1359	0.319325	10	0	26
259	2017	0.693147	0	0.272865	23	51	0	3	3.29	21.2248	0.334985	10	0	26
259	2018	0.693147	0	0.272865	18	52	0	3	4.52	21.3961	0.433546	10	0	26
259	2019	0.693147	0	0.272865	21	53	0	3	5.99	21.3418	0.374997	10	0	26
259	2020	0.693147	0	0.272865	27	54	0	3	3.93	21.9605	0.428227	10	0	39
260	2015	1.60944	2.77259	0.450288	23	50	1	3	16.2	21.4156	0.175459	8	1	39
260	2016	2.77259	2.70805	0.450288	53	51	1	3	20.3	21.3833	0.134659	8	1	39
260	2017	2.56495	2.83321	0.450288	19	52	1	3	15.4	21.4724	0.15267	8	1	39
260	2018	2.56495	3.4012	0.450288	18	53	1	3	21.5	21.544	0.171147	8	1	39
260	2019	2.48491	2.3979	0.450288	18	54	1	3	22	21.5596	0.139733	8	1	39
260	2020	2.19722	2.19722	0.450288	24	55	1	3	12.4	22.0406	0.098859	8	1	39
261	2015	0	1.38629	0.19486	20	33	0	3	2.6	20.8197	0.519312	8	0	36
261	2016	0	1.09861	0.19486	21	33	0	3	3.93	21.2926	0.274173	8	0	36
261	2017	0.693147	1.38629	0.19486	20	33	0	3	3.67	21.4294	0.331834	8	0	36
261	2018	0	1.09861	0.19486	13	33	0	3	4.78	21.8186	0.411117	8	0	36
261	2019	0.693147	2.48491	0.19486	4	33	0	3	5.22	21.894	0.484981	8	0	36
261	2020	0	2.30259	0.19486	-1.5	34	0	3	4.73	21.9109	0.525414	8	0	36
262	2015	3.29584	0.693147	0.392663	59	47	0	4	7.59	22.254	0.680907	8	1	39
262	2016	3.04452	0	0.392663	26	48	0	4	7.53	22.5367	0.497991	8	1	39
262	2017	2.77259	3.3322	0.392663	25	49	0	4	6.83	23.0346	0.65948	8	1	39
262	2018	2.70805	3.4012	0.392663	28	50	0	4	7.99	23.301	0.692376	8	1	39
262	2019	2.48491	2.56495	0.392663	29	51	0	4	9.67	23.5428	0.72442	8	1	39
262	2020	1.38629	2.77259	0.392663	31	52	0	4	9.25	23.7661	0.429744	8	1	39
263	2015	0.693147	2.07944	0.202189	22	53	1	2	5.41	20.3057	0.2349	7	0	35
263	2016	1.38629	0.693147	0.202189	19	54	1	2	8.35	20.8093	0.153551	7	0	35
263	2017	0.693147	3.04452	0.202189	19	55	1	2	5.48	21.146	0.35676	7	0	35
263	2018	0.693147	1.94591	0.202189	10	56	1	2	5.7	21.5666	0.571412	7	0	35
263	2019	1.38629	2.19722	0.202189	0.05	57	1	2	5.84	21.4518	0.769924	7	0	35
263	2020	0	2.83321	0.202189	4.7	58	1	2	4.21	21.6002	0.57949	7	0	35
264	2015	1.60944	1.38629	0.46101	15	46	0	4	6.05	21.9999	0.435197	8	0	36
264	2016	0.693147	0	0.46101	22	47	0	4	5.51	21.9886	0.409972	8	0	36
264	2017	0.693147	2.19722	0.46101	13	48	0	4	5.27	21.8741	0.332779	8	0	36
264	2018	1.09861	1.38629	0.46101	19	49	0	4	4.87	21.8879	0.342796	8	0	36
264	2019	0.693147	2.19722	0.46101	21	50	0	4	5.12	21.8903	0.330607	8	0	36
264	2020	0	1.94591	0.46101	25	51	0	4	5.05	21.944	0.331841	8	0	36
265	2015	0.693147	1.38629	0.168491	13	64	1	2	5.24	22.32	0.611499	8	0	35
265	2016	0	1.94591	0.168491	14	65	1	2	5.9	22.5787	0.555545	8	0	35
265	2017	0.693147	1.60944	0.168491	13	66	1	2	19.6	22.6379	0.573741	8	0	35
265	2018	0	0	0.168491	16	67	1	2	19	22.8112	0.569097	8	0	35
265	2019	0	1.94591	0.168491	14	67	1	2	17.3	22.7313	0.439473	8	0	35
265	2020	0.693147	3.04452	0.168491	15	67	1	2	16.3	22.8278	0.474942	8	0	35
266	2015	2.30259	2.07944	0.167855	14	46	0	3	3.23	21.2875	0.157905	10	0	38
266	2016	1.79176	2.77259	0.167855	5.8	46	0	3	3.22	21.2359	0.159785	10	0	38
266	2017	1.60944	1.38629	0.167855	14	48	0	3	2.94	21.3167	0.215676	10	0	38
266	2018	1.60944	1.09861	0.167855	15	49	0	3	2.61	21.5325	0.369842	10	0	38
266	2019	0.693147	1.94591	0.167855	17	50	0	3	3.97	21.8014	0.476124	10	0	38
266	2020	0.693147	2.30259	0.167855	11	51	0	3	3.85	21.8823	0.516056	10	0	38
267	2015	2.70805	3.49651	0.14362	23	50	1	3	3.31	20.814	0.157339	7	0	35
267	2016	2.30259	3.49651	0.14362	23	51	1	3	5.16	21.039	0.208188	7	0	35
267	2017	2.48491	3.21888	0.14362	25	52	1	3	2.72	21.7452	0.207321	7	0	35
267	2018	2.19722	2.48491	0.14362	25	53	1	3	3.6	22.0135	0.284073	7	0	35
267	2019	1.09861	1.09861	0.14362	25	54	1	3	3.31	22.3042	0.339948	7	0	35
267	2020	0	2.30259	0.14362	24	55	1	3	3.54	22.493	0.362049	7	0	35
268	2015	1.38629	4.51086	0.166056	23	59	1	3	3.64	22.037	0.312151	7	0	38
268	2016	2.77259	3.98898	0.166056	68	60	1	3	3.98	22.3516	0.415907	7	0	38
268	2017	3.09104	3.13549	0.166056	19	62	1	3	4.05	22.3657	0.372811	7	0	38
268	2018	2.99573	4.33073	0.166056	26	63	1	3	4.17	22.2215	0.378191	7	0	38
268	2019	1.38629	5.51745	0.166056	22	63	1	3	4.62	22.4054	0.405044	7	0	38
268	2020	2.89037	4.83628	0.166056	23	64	1	3	4.94	22.6872	0.516182	7	0	38
269	2015	2.48491	2.48491	0.214787	30	39	0	2	2.95	20.9976	0.337196	7	0	34
269	2016	1.09861	2.56495	0.214787	63	41	0	2	2.7	21.631	0.467704	7	0	34
269	2017	2.19722	3.3673	0.214787	29	42	0	2	1.93	21.8099	0.452806	7	0	34
269	2018	1.94591	3.04452	0.214787	30	43	0	4	2.81	21.9863	0.500779	7	0	34
269	2019	1.60944	3.71357	0.214787	22	44	0	4	3.26	22.3437	0.678953	7	0	34
269	2020	0	4.09434	0.214787	28	45	0	4	4.17	22.4563	0.662523	7	0	34
270	2015	0.693147	0	0.246521	26	44	1	4	11.1	20.9321	0.292099	8	0	65
270	2016	1.09861	1.09861	0.246521	15	45	1	4	12.6	20.9952	0.311262	8	0	65
270	2017	2.48491	0	0.246521	32	46	1	4	8.76	21.3985	0.487171	8	0	65
270	2018	2.07944	0	0.246521	37	47	1	4	7.79	21.821	0.410058	8	0	65
270	2019	2.3979	0	0.246521	31	48	1	4	7.14	22.0614	0.447328	8	0	65
270	2020	2.70805	1.09861	0.246521	29	49	1	4	8.19	22.2463	0.412124	8	0	65
271	2015	1.38629	0	0.241219	31	38	0	6	1.65	21.2242	0.310918	7	0	39
271	2016	1.09861	1.09861	0.241219	29	39	0	6	1.37	21.801	0.196429	7	0	39
271	2017	1.60944	1.60944	0.241219	30	40	0	6	1.92	21.9213	0.229235	7	0	39
271	2018	1.79176	1.79176	0.241219	33	41	0	6	1.79	22.0466	0.246674	7	0	39
271	2019	0.693147	2.30259	0.241219	32	42	0	6	2.19	22.2086	0.279781	7	0	39
271	2020	0.693147	2.83321	0.241219	34	43	0	6	1.86	22.504	0.321941	7	0	39
272	2015	1.60944	3.52636	0.157665	26	46	0	4	3.58	21.3282	0.427979	7	0	35
272	2016	1.09861	3.73767	0.157665	25	47	0	4	3.62	21.6962	0.523042	7	0	35
272	2017	2.07944	3.78419	0.157665	24	48	0	4	2.94	22.0741	0.415291	7	0	35
272	2018	1.60944	3.91202	0.157665	23	49	0	4	2.82	22.1421	0.410727	7	0	35
272	2019	1.38629	3.97029	0.157665	23	50	0	4	3.13	22.2361	0.416766	7	0	35
272	2020	1.94591	4.36945	0.157665	26	51	0	4	2.27	22.422	0.432531	7	0	35
273	2015	1.38629	1.60944	0.193103	28	55	0	3	1.79	22.0999	0.371599	8	0	34
273	2016	1.79176	1.38629	0.193103	66	55	0	3	1.15	22.1201	0.375285	8	0	34
273	2017	2.83321	0	0.193103	23	57	0	3	1.57	22.1646	0.38441	8	0	34
273	2018	2.19722	2.3979	0.193103	26	58	0	3	3.78	22.3282	0.442876	8	0	34
273	2019	2.48491	2.56495	0.193103	28	59	0	3	3.45	22.325	0.461869	8	0	34
273	2020	1.38629	3.3322	0.193103	29	60	0	3	3.58	22.4003	0.456883	8	0	34
274	2015	1.60944	2.94444	0.175428	32	45	0	6	3.69	20.737	0.279087	7	0	36
274	2016	2.48491	1.79176	0.175428	32	46	0	6	3.48	20.8949	0.282483	7	0	36
274	2017	0.693147	0	0.175428	32	47	0	6	4	21.5448	0.177124	7	0	36
274	2018	1.79176	3.52636	0.175428	32	48	0	6	4.23	21.536	0.14097	7	0	36
274	2019	1.09861	3.43399	0.175428	32	49	0	6	4.33	21.499	0.146626	7	0	36
274	2020	2.07944	3.82864	0.175428	32	50	0	6	4.62	21.5395	0.155943	7	0	36
275	2015	0	3.13549	0.148684	18	54	0	6	4.06	20.9534	0.209618	7	0	35
275	2016	1.38629	2.3979	0.148684	2.1	55	0	6	7.21	20.9322	0.259525	7	0	35
275	2017	1.60944	2.19722	0.148684	8.4	56	0	6	3.24	21.0785	0.343128	7	0	35
275	2018	0	1.09861	0.148684	23	56	0	6	3.52	21.1861	0.366659	7	0	35
275	2019	0	2.07944	0.148684	25	57	0	6	4.14	21.2846	0.424185	7	0	35
275	2020	0.693147	2.89037	0.148684	15	58	0	6	3.71	21.1793	0.424795	7	0	35
276	2015	1.09861	2.07944	0.220631	21	50	1	4	4.78	21.3028	0.501884	7	0	39
276	2016	1.09861	2.83321	0.220631	15	51	1	4	4.74	21.377	0.514088	7	0	39
276	2017	1.38629	2.30259	0.220631	17	52	1	4	4.66	21.5843	0.58134	7	0	39
276	2018	1.94591	2.30259	0.220631	18	53	1	4	4.82	22.0655	0.405956	7	0	39
276	2019	0.693147	2.30259	0.220631	23	54	1	4	4.08	22.2234	0.449815	7	0	39
276	2020	1.38629	1.60944	0.220631	23	55	1	4	4.3	22.4395	0.370651	7	0	39
277	2015	1.94591	0	0.334448	25	42	1	2	3.53	20.5081	0.211651	8	1	38
277	2016	1.79176	2.70805	0.334448	20	43	1	2	4.98	20.544	0.2271	8	1	38
277	2017	1.09861	0.693147	0.334448	22	44	1	4	3.61	20.6271	0.265544	8	1	38
277	2018	2.07944	1.09861	0.334448	25	45	1	4	3.3	20.6822	0.299901	8	1	38
277	2019	1.38629	0	0.334448	28	46	0	4	3.45	20.7758	0.340698	8	1	38
277	2020	1.09861	0	0.334448	28	47	0	4	3.4	20.9588	0.402089	8	1	38
